# Supplementary material
Source: PubMed Central journal article supplement (PMC5489259)
Supplement: NIHMS863501-supplement-2.pdf [file NIHMS863501-supplement-2.pdf]

### A mRNA Expression Levels

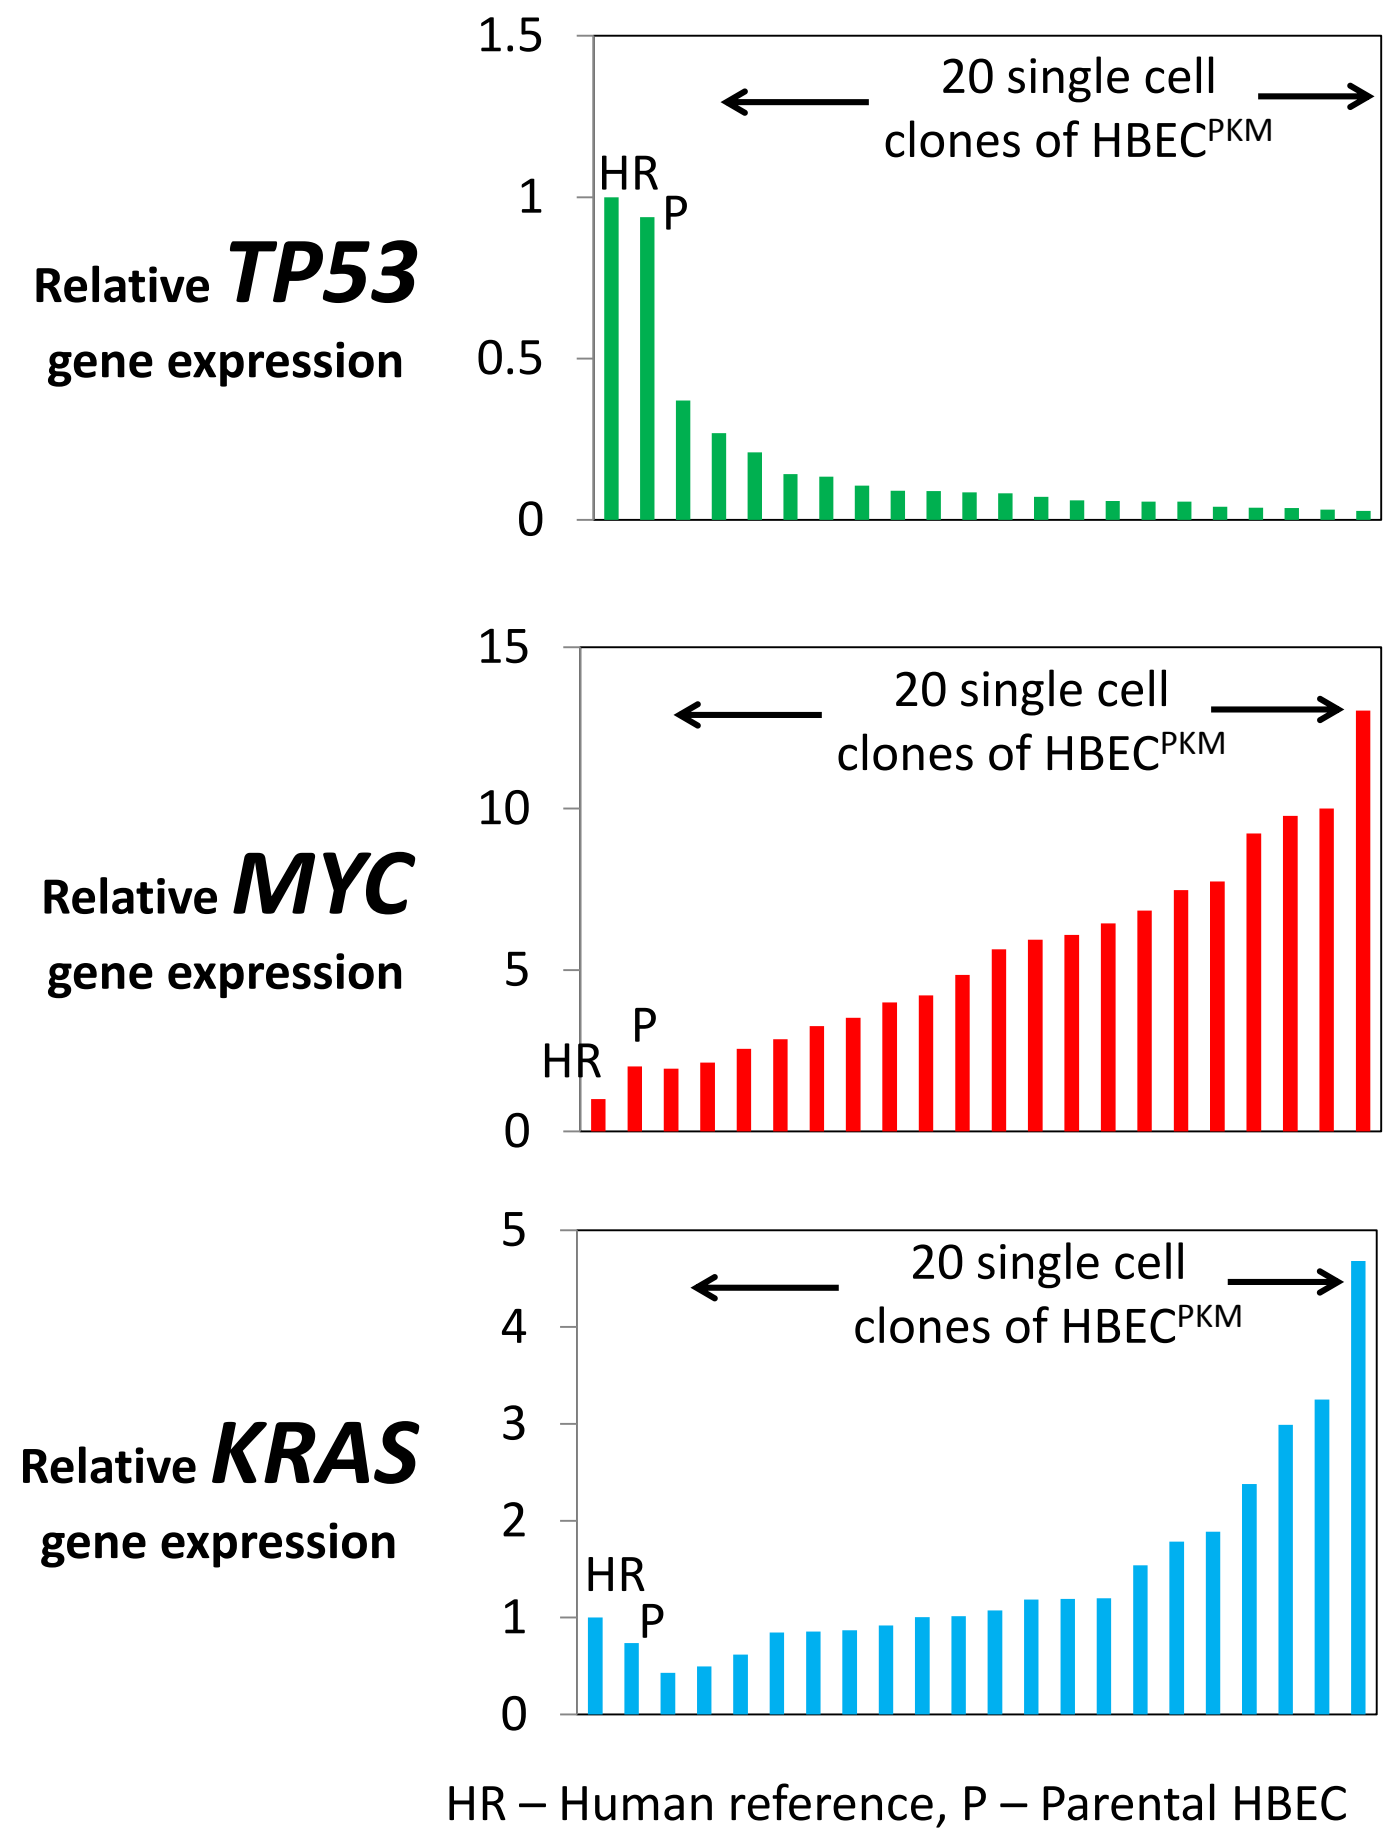

### B Protein Expression Levels

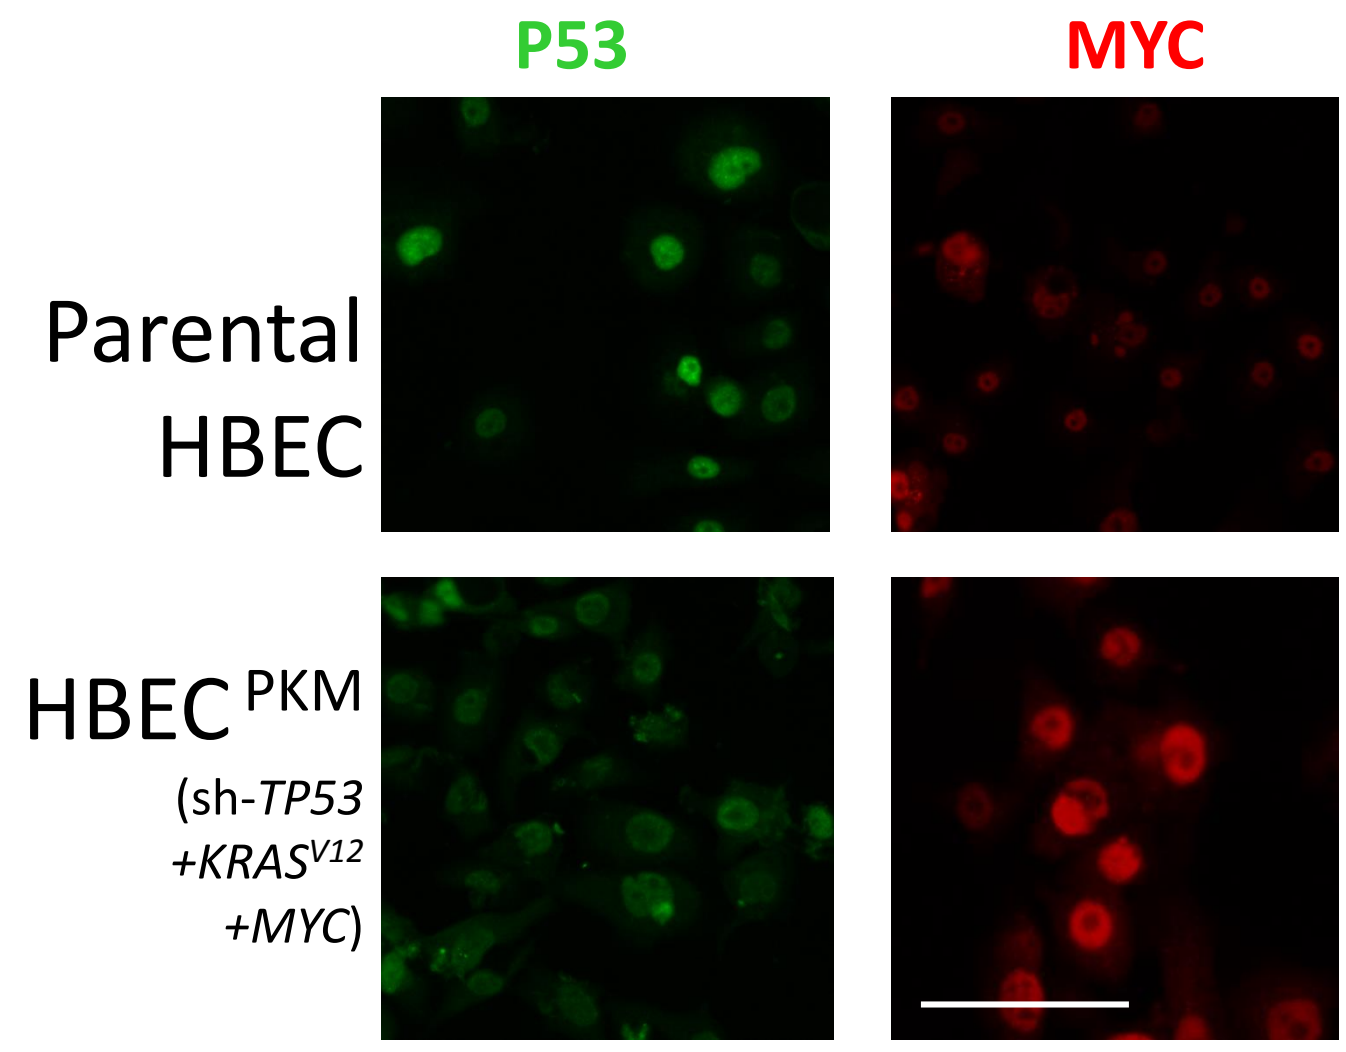

### C Quantitation of protein expression

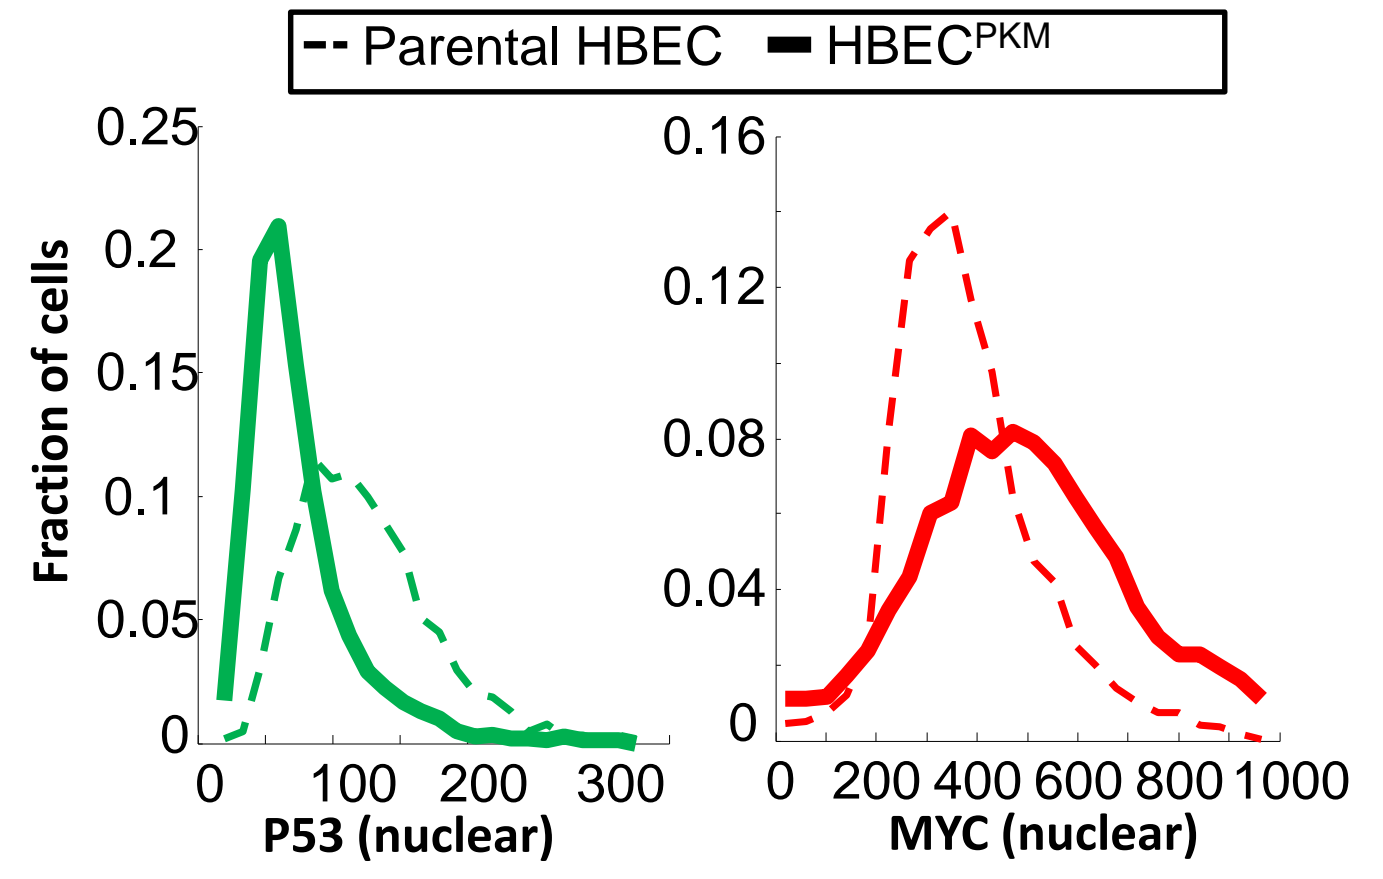

Supplementary Figure 2

**A**

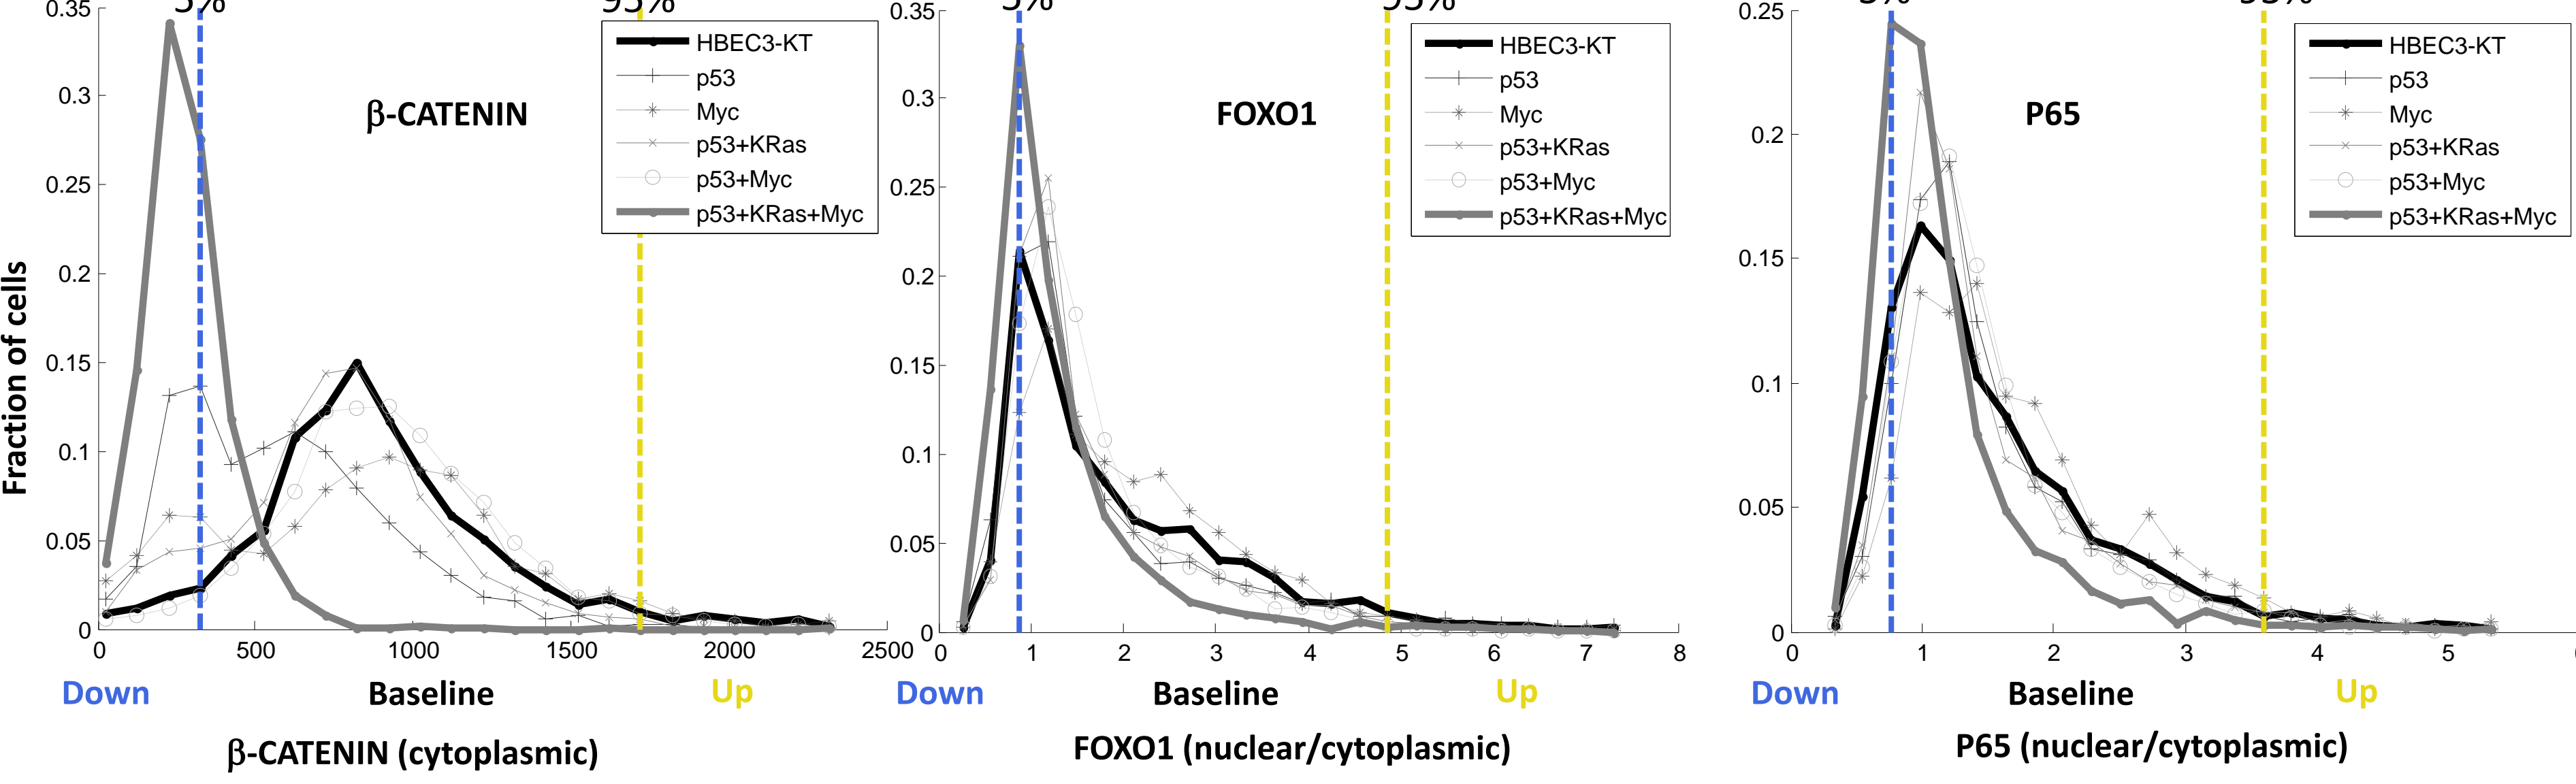

**B**

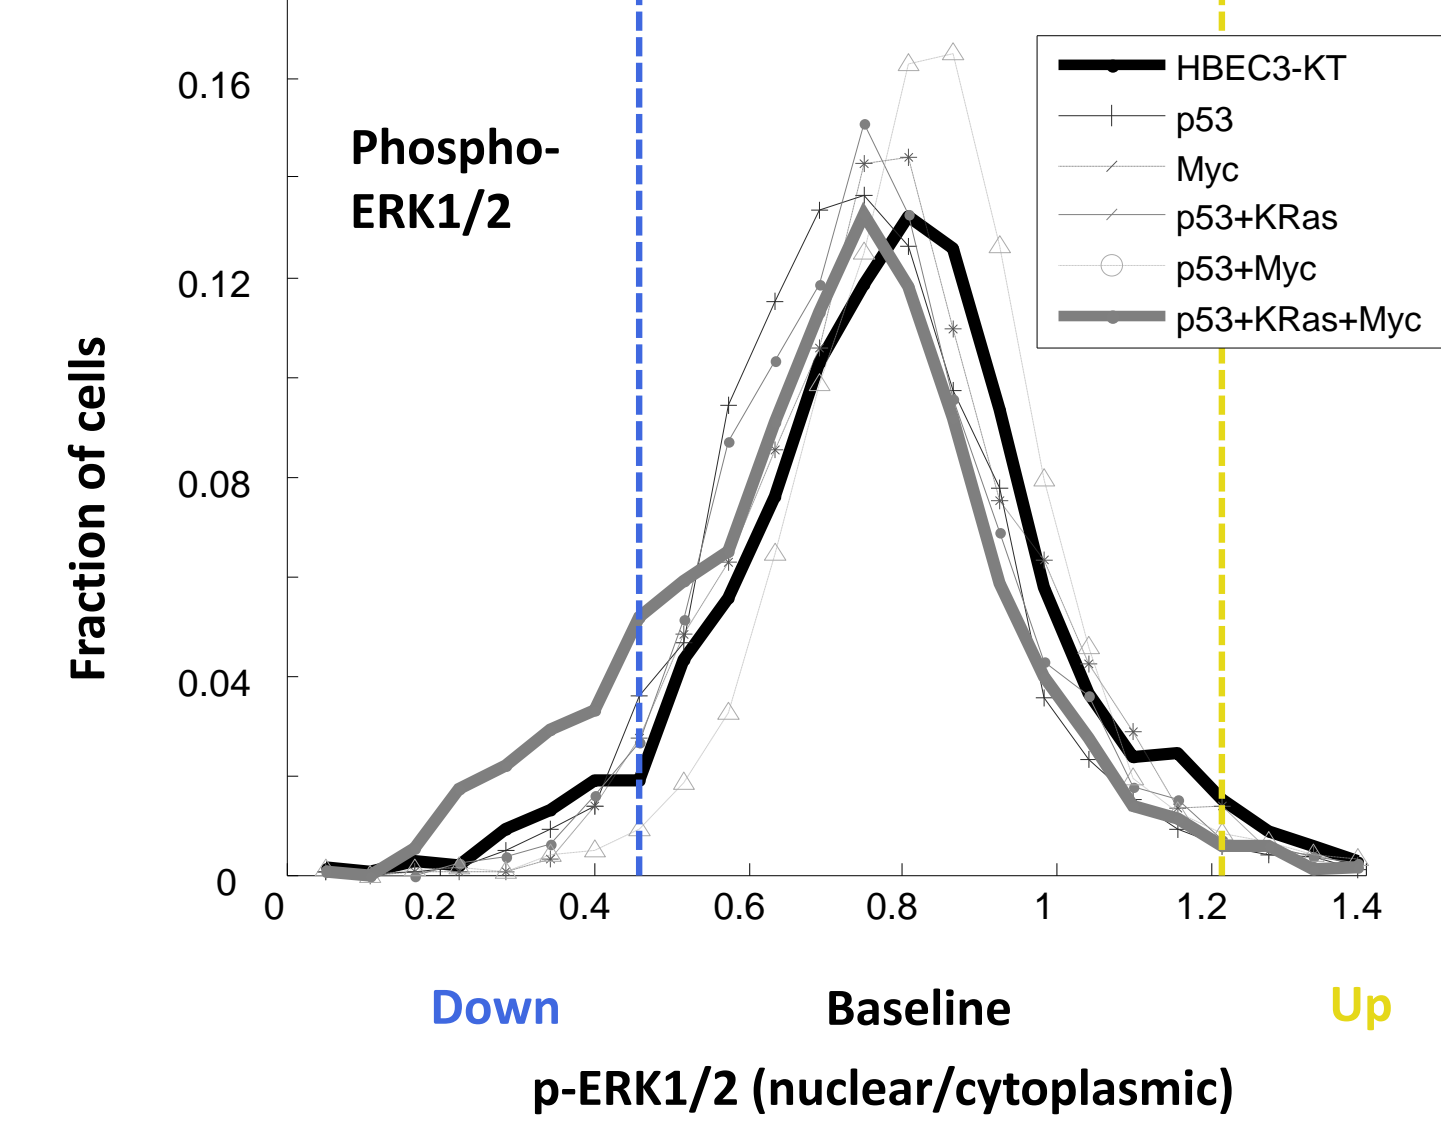

**C**

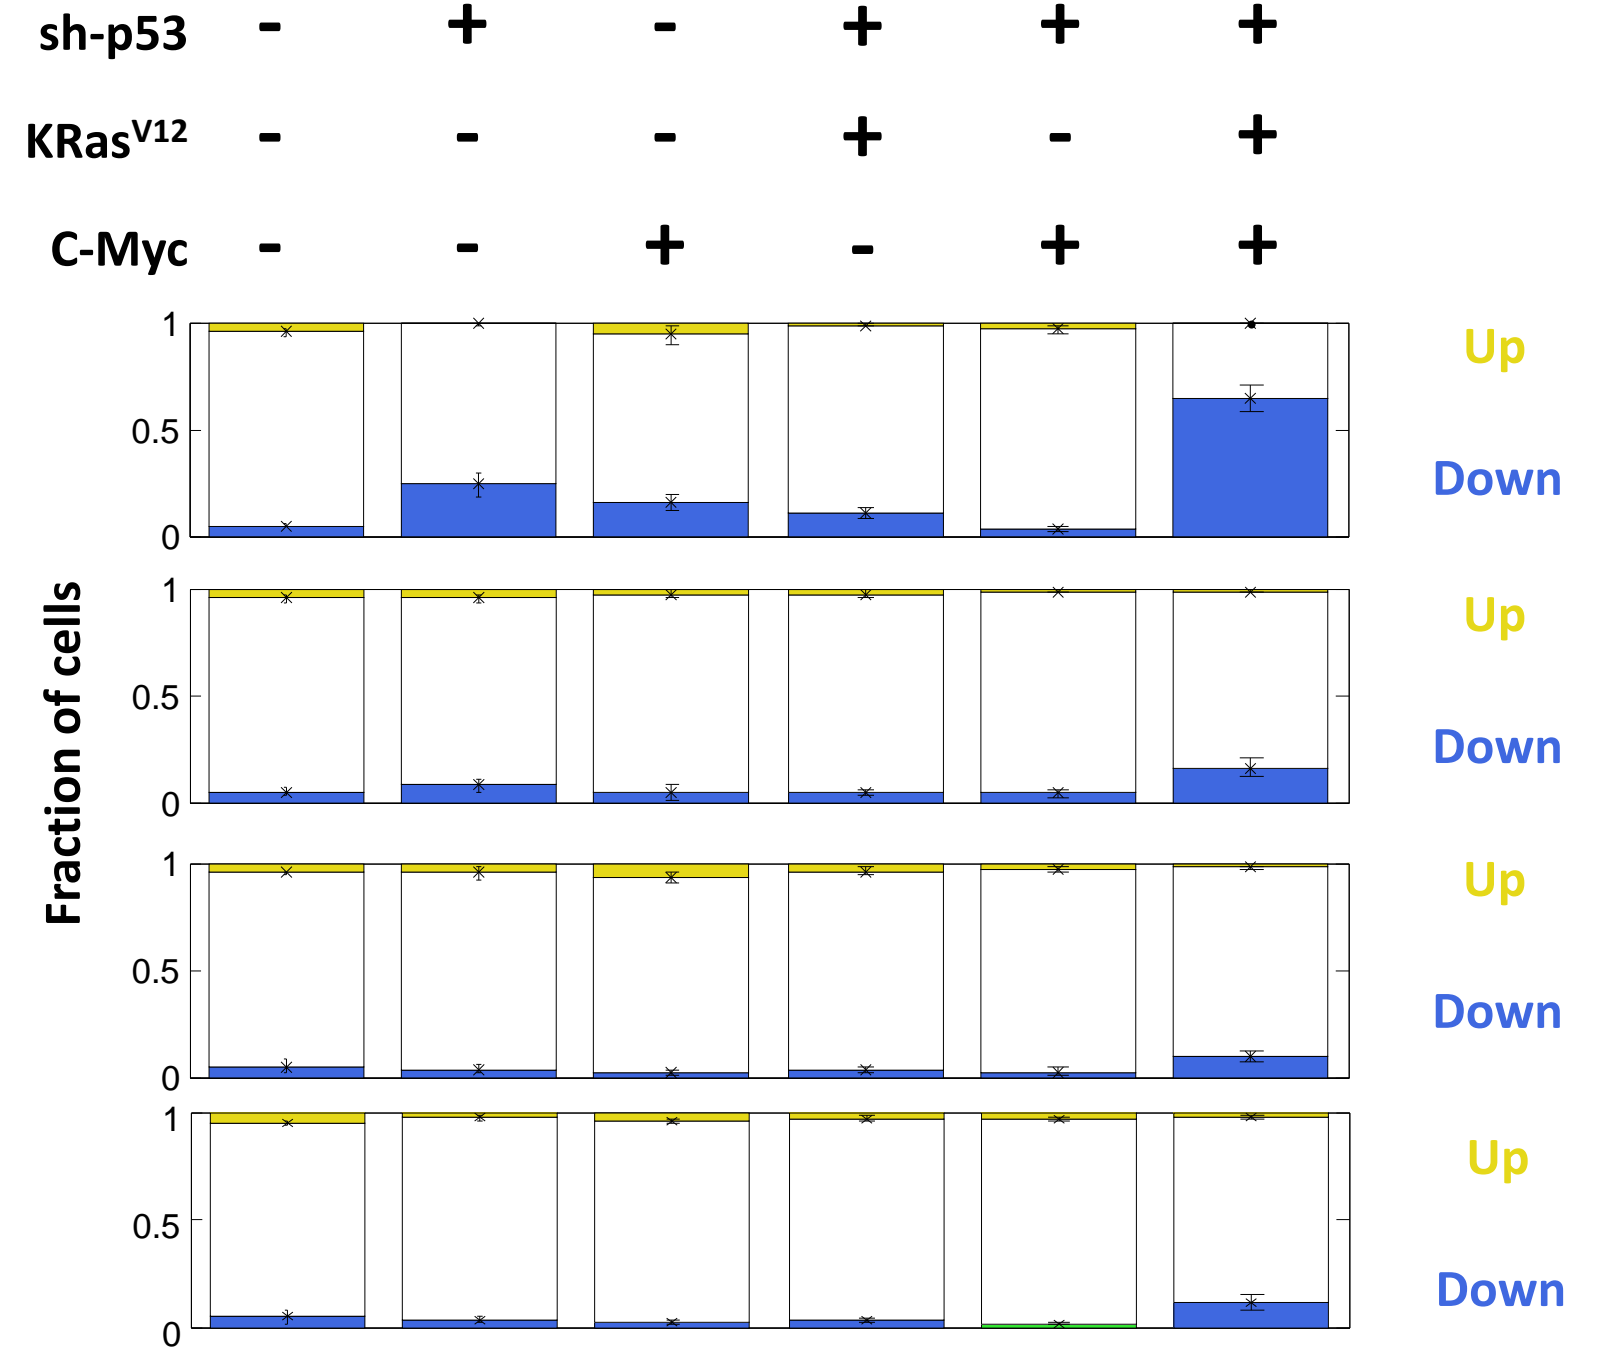

Supplementary Figure 3

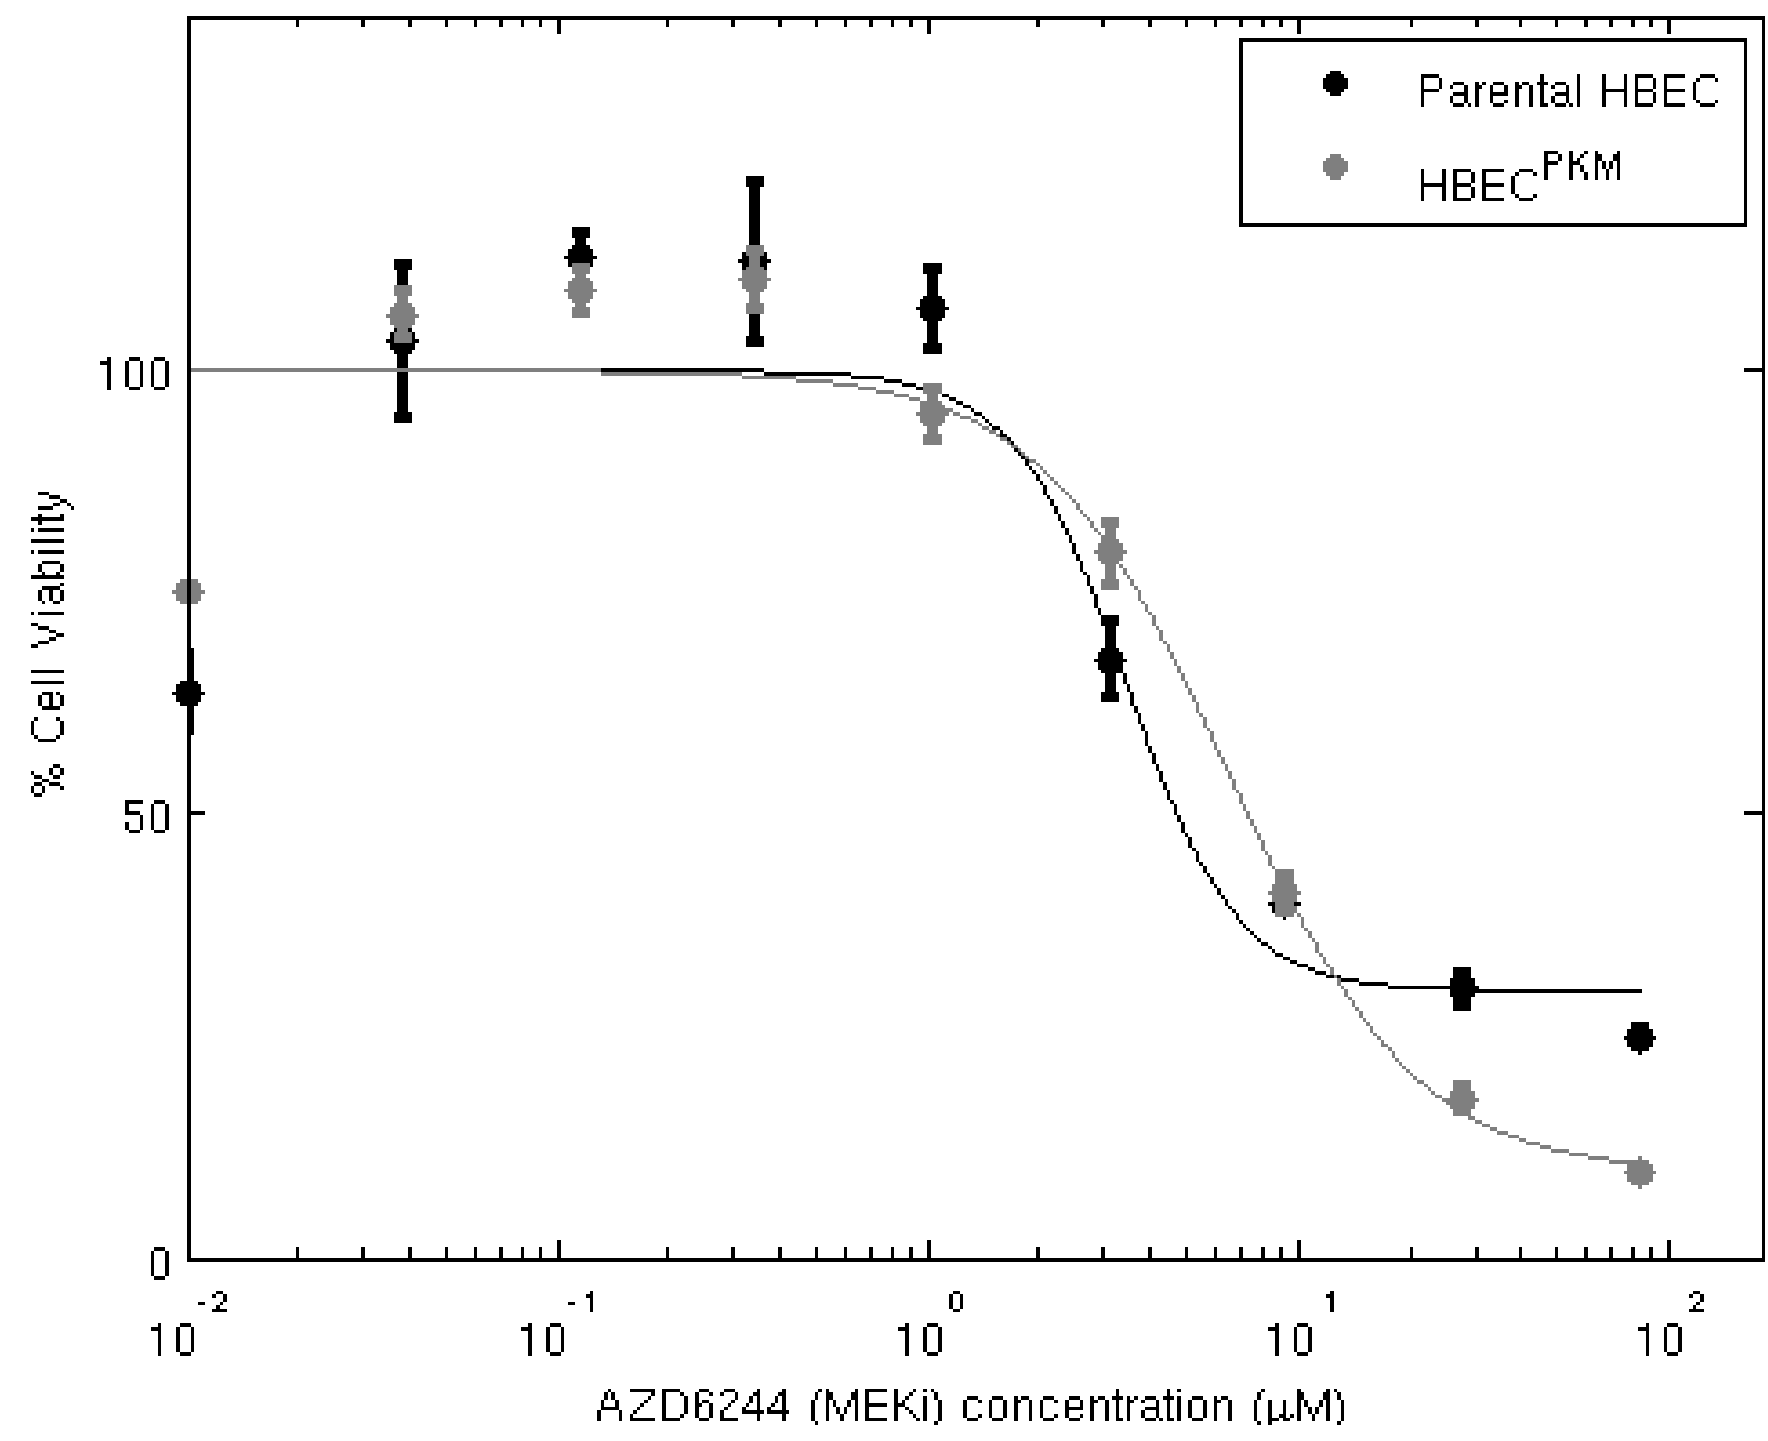

Supplementary Figure 4

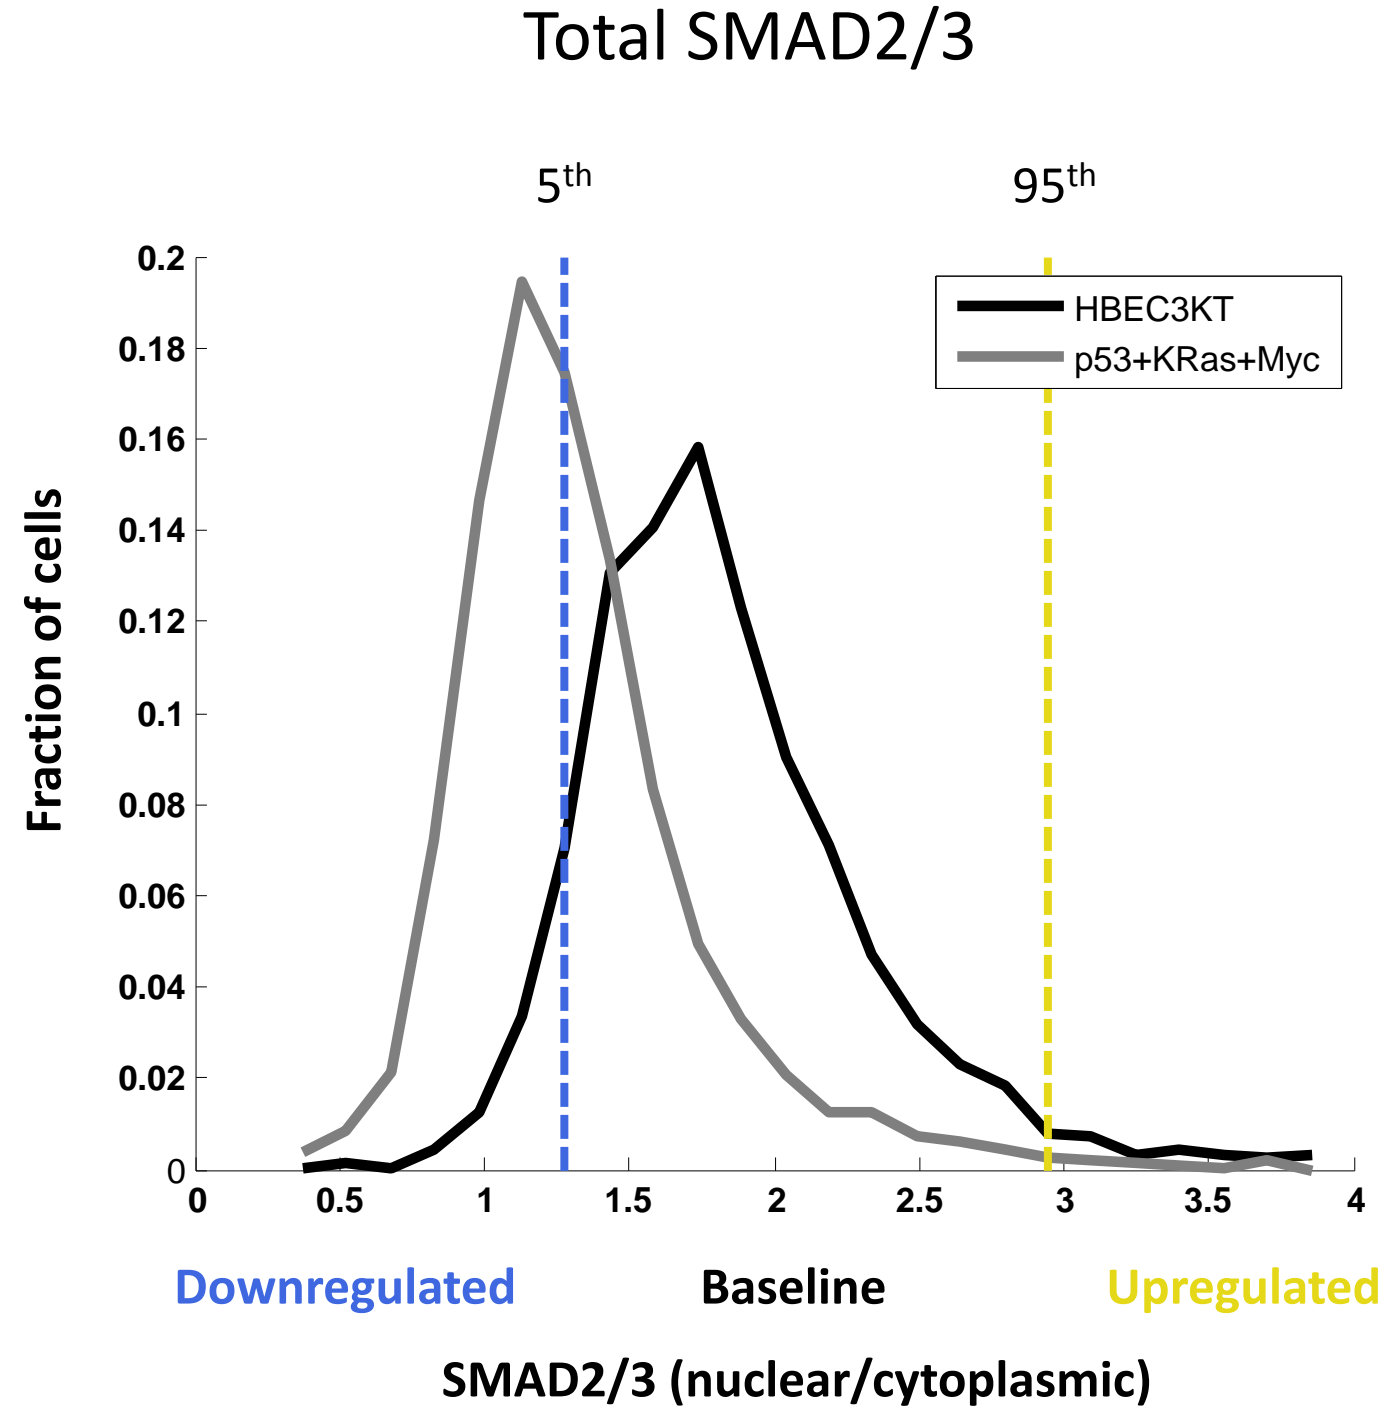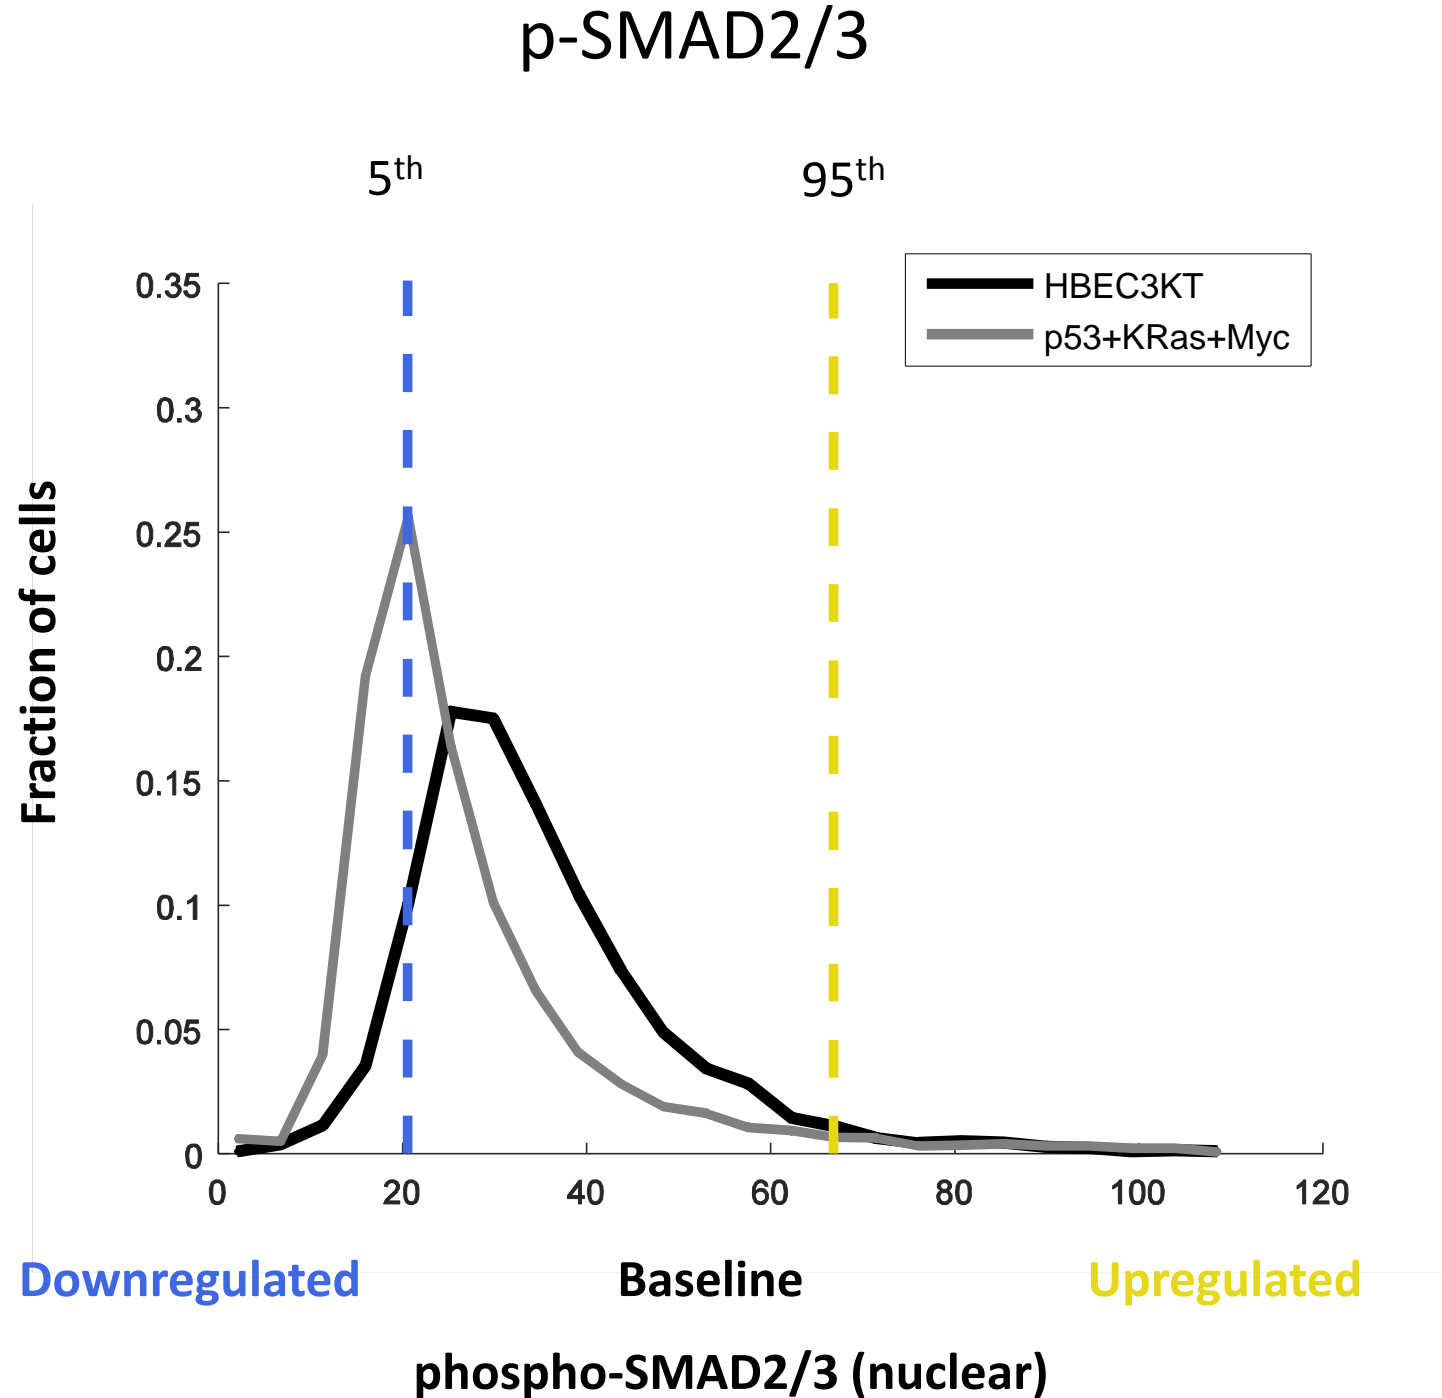

Supplementary Figure 5

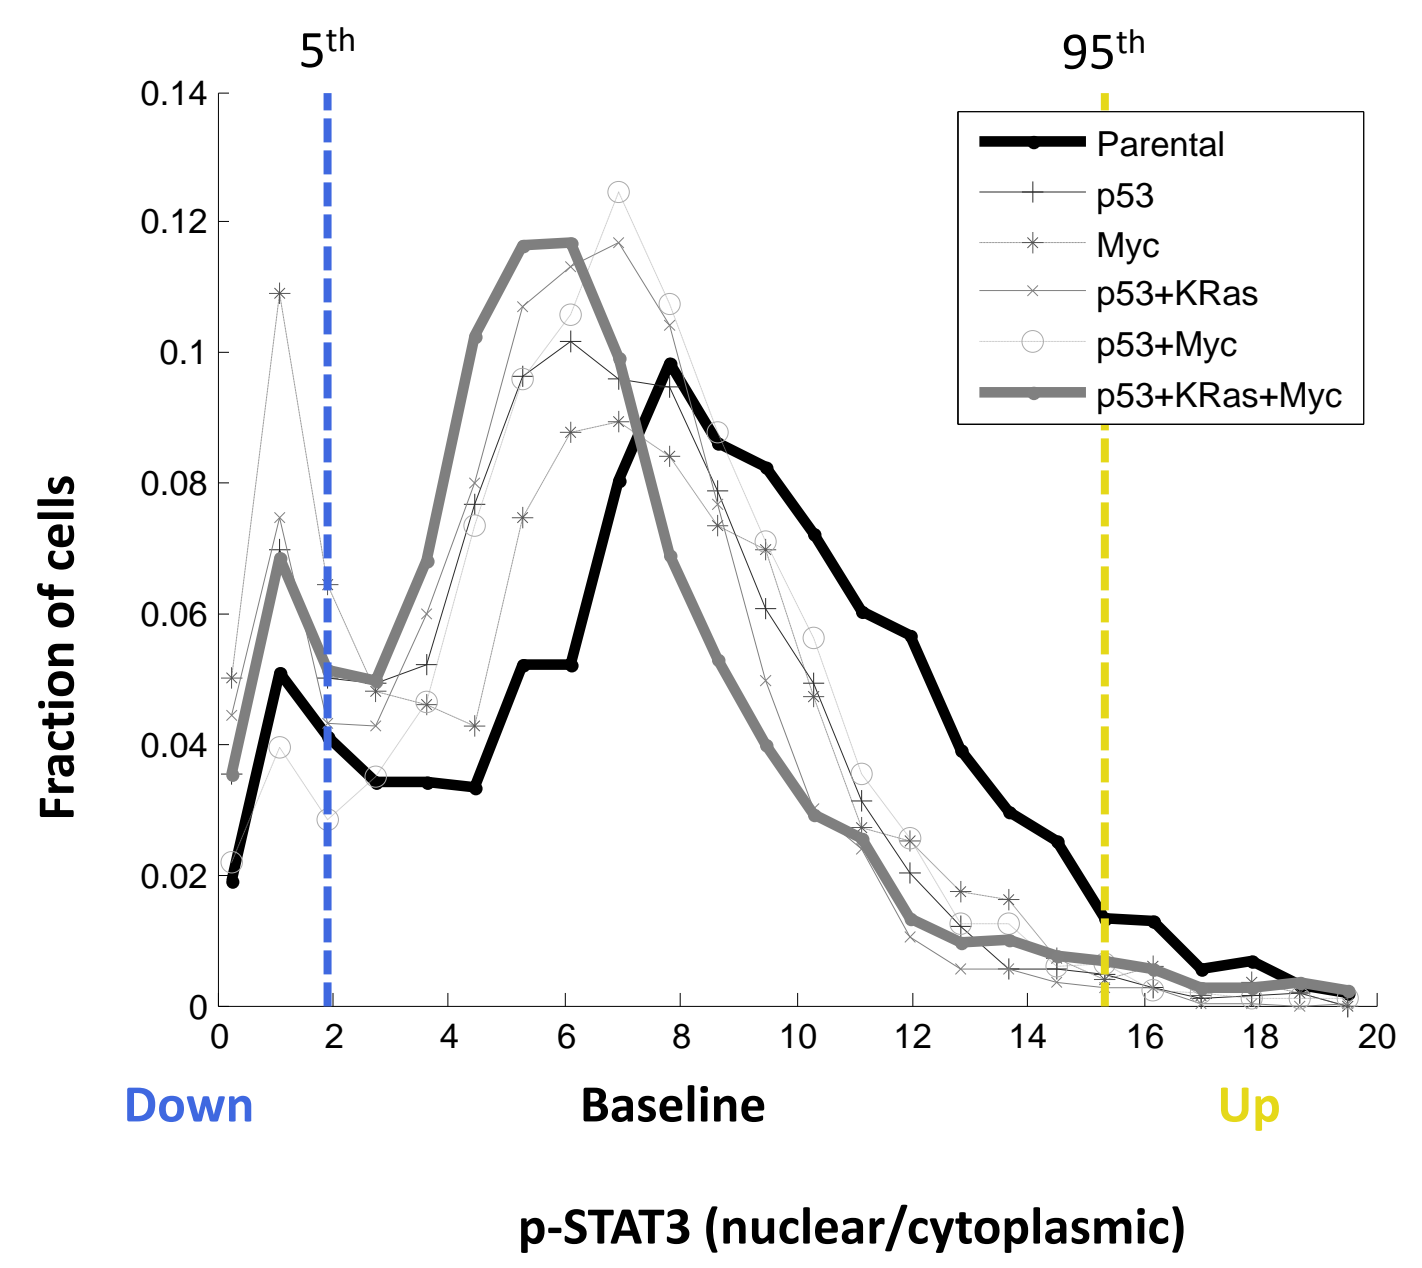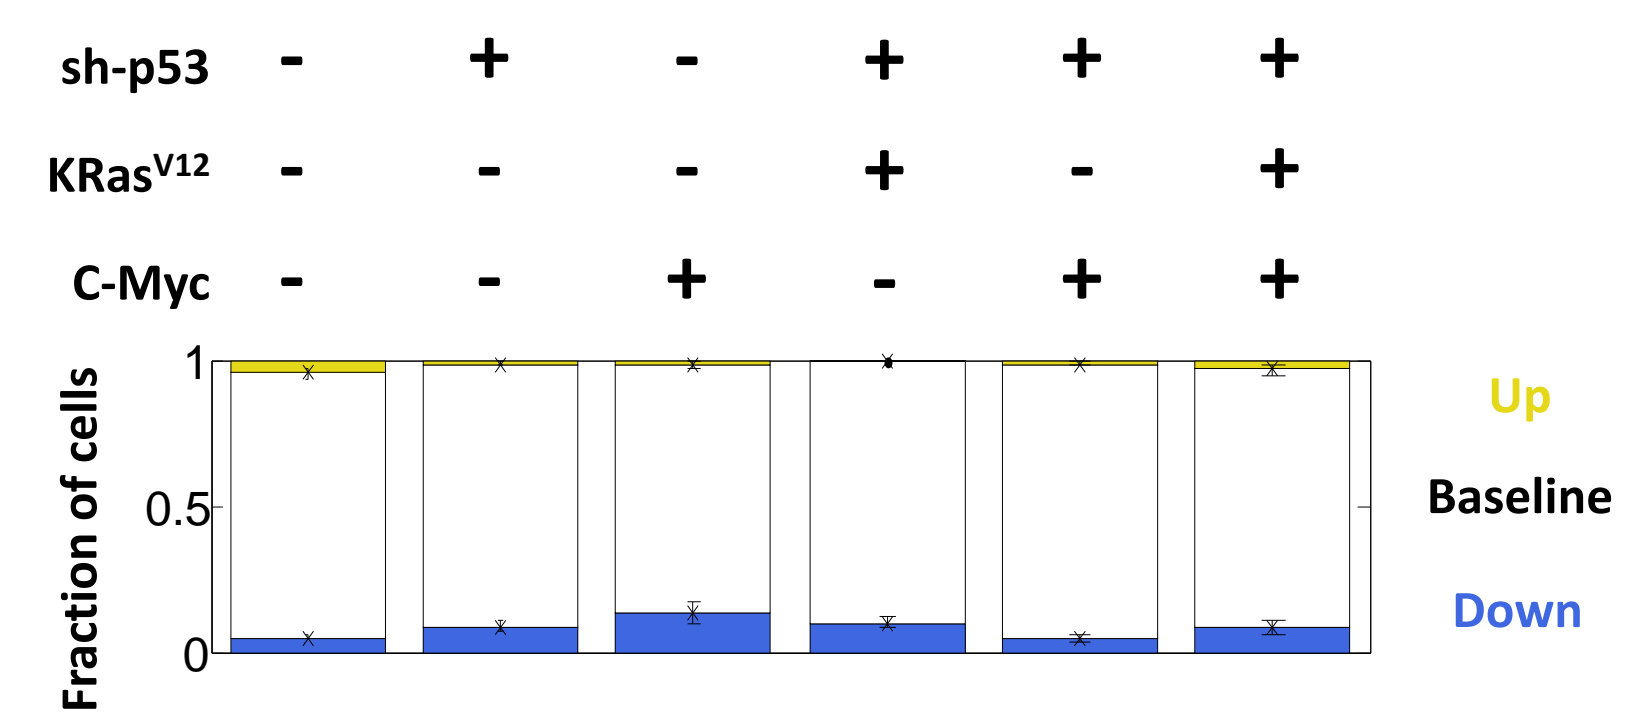

High EGF (5 ng/mL) growth condition

Parental HBEC

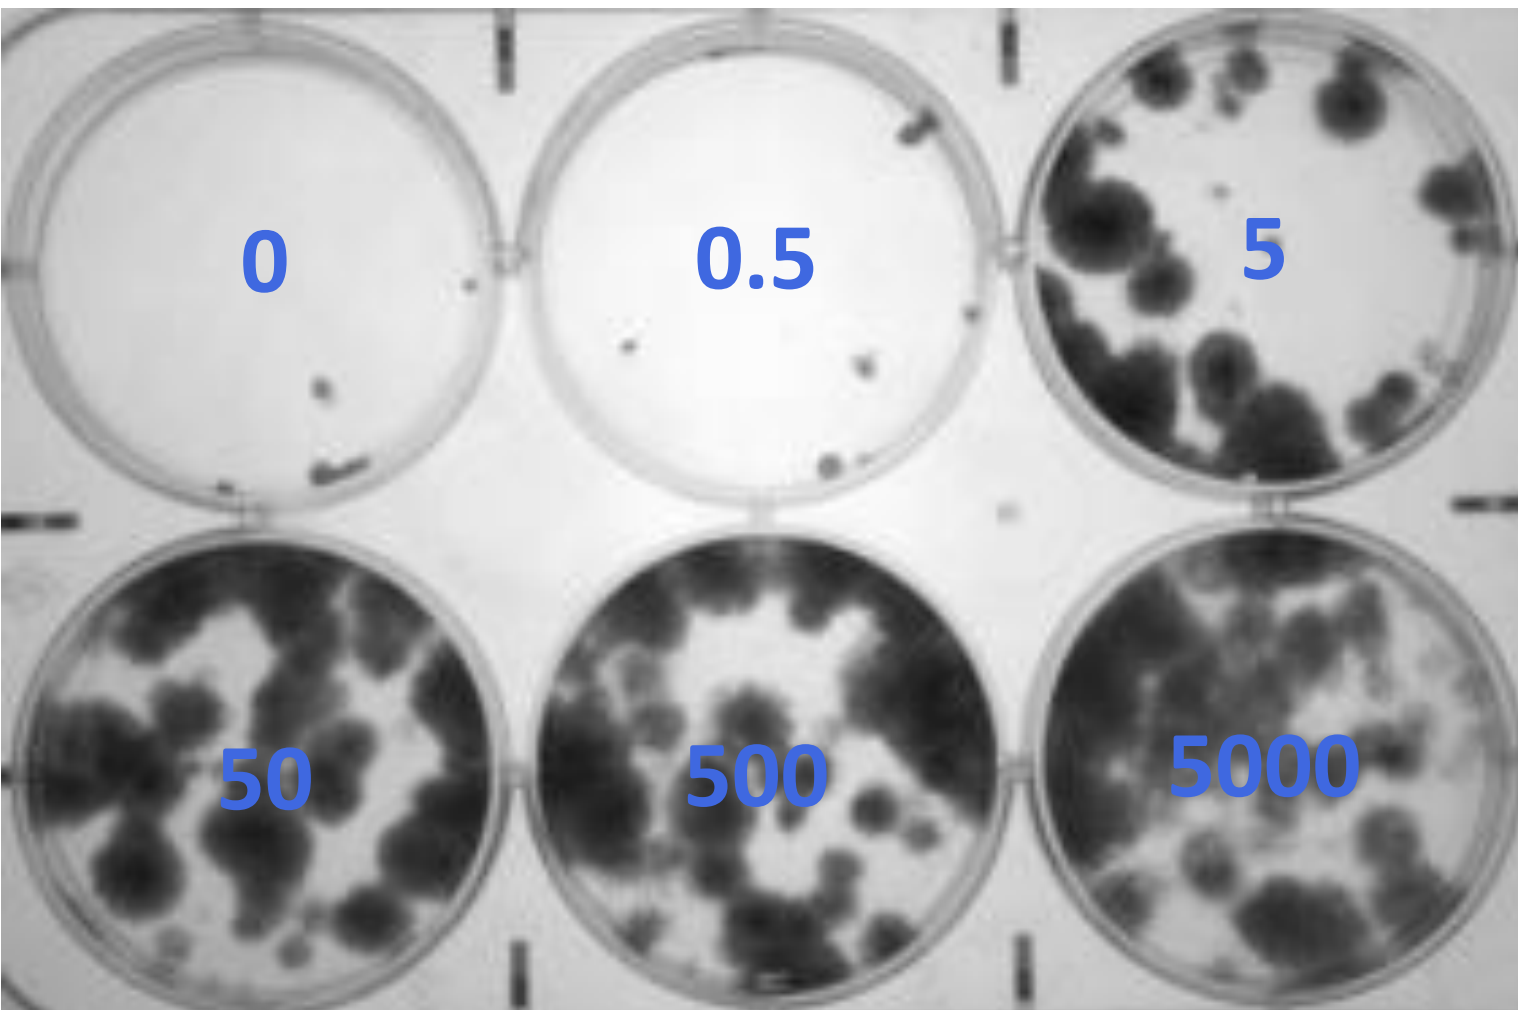

HBEC<sup>PKM</sup>

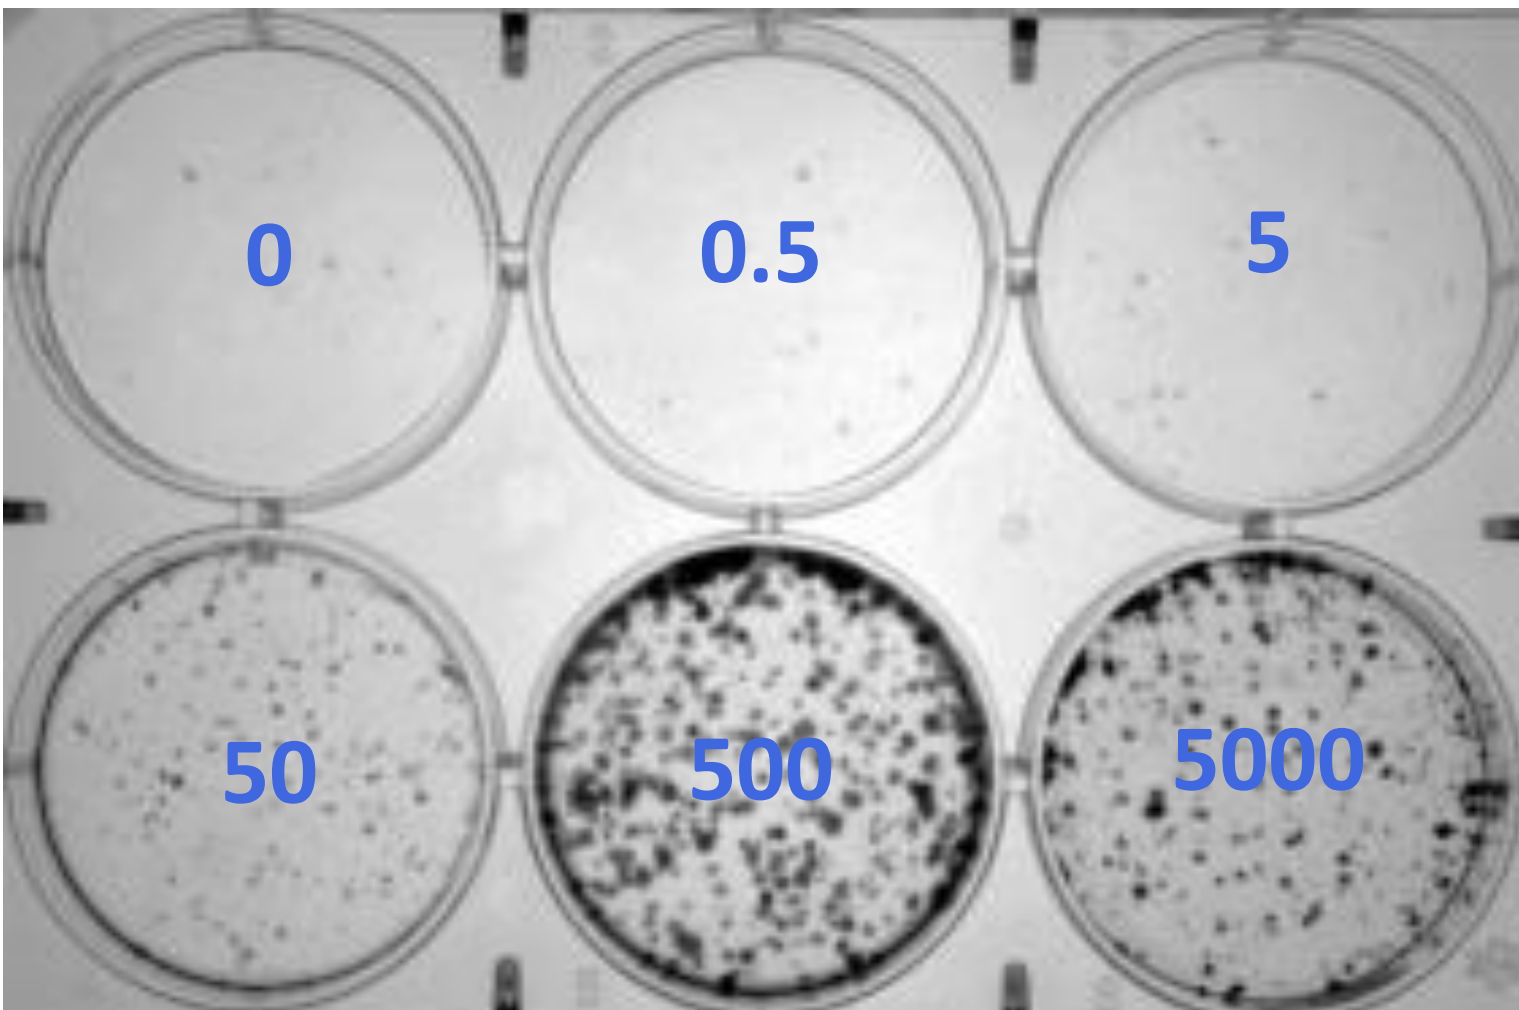

Supplementary Figure 7

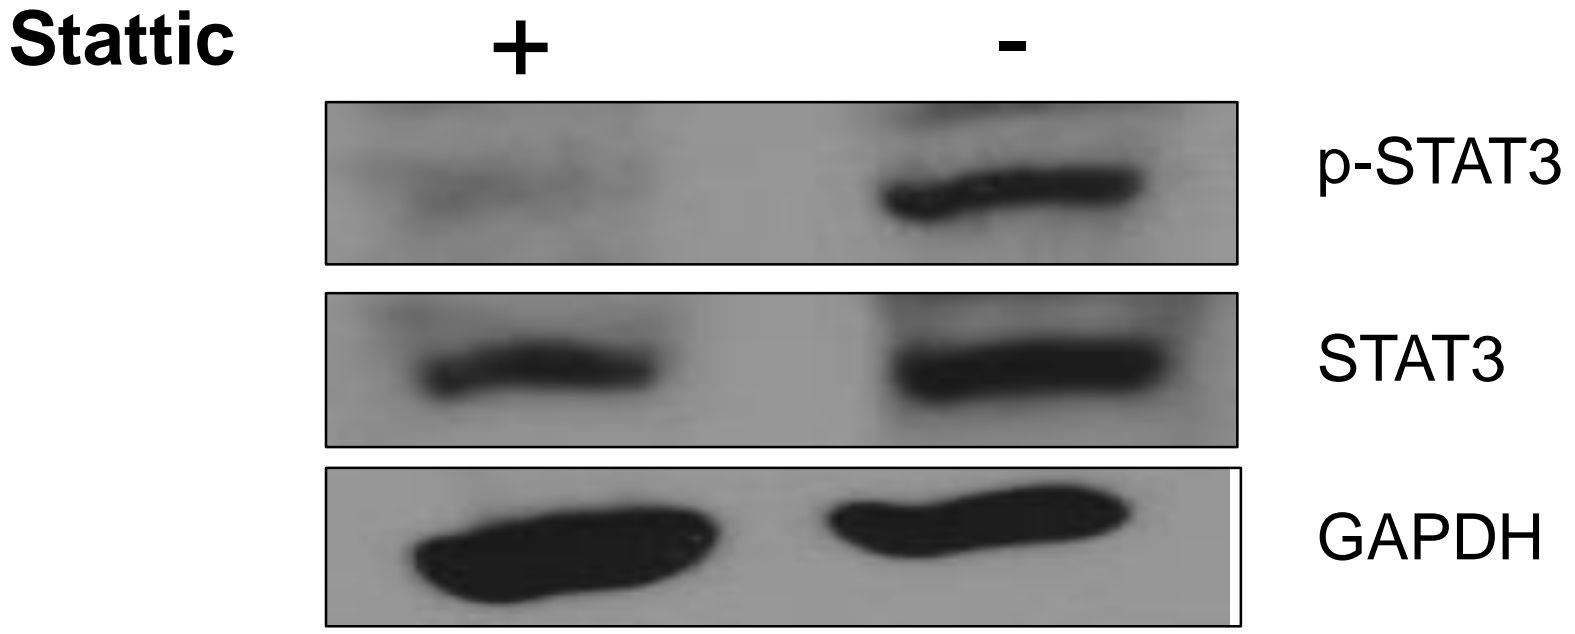

Supplementary Figure 8

**A**

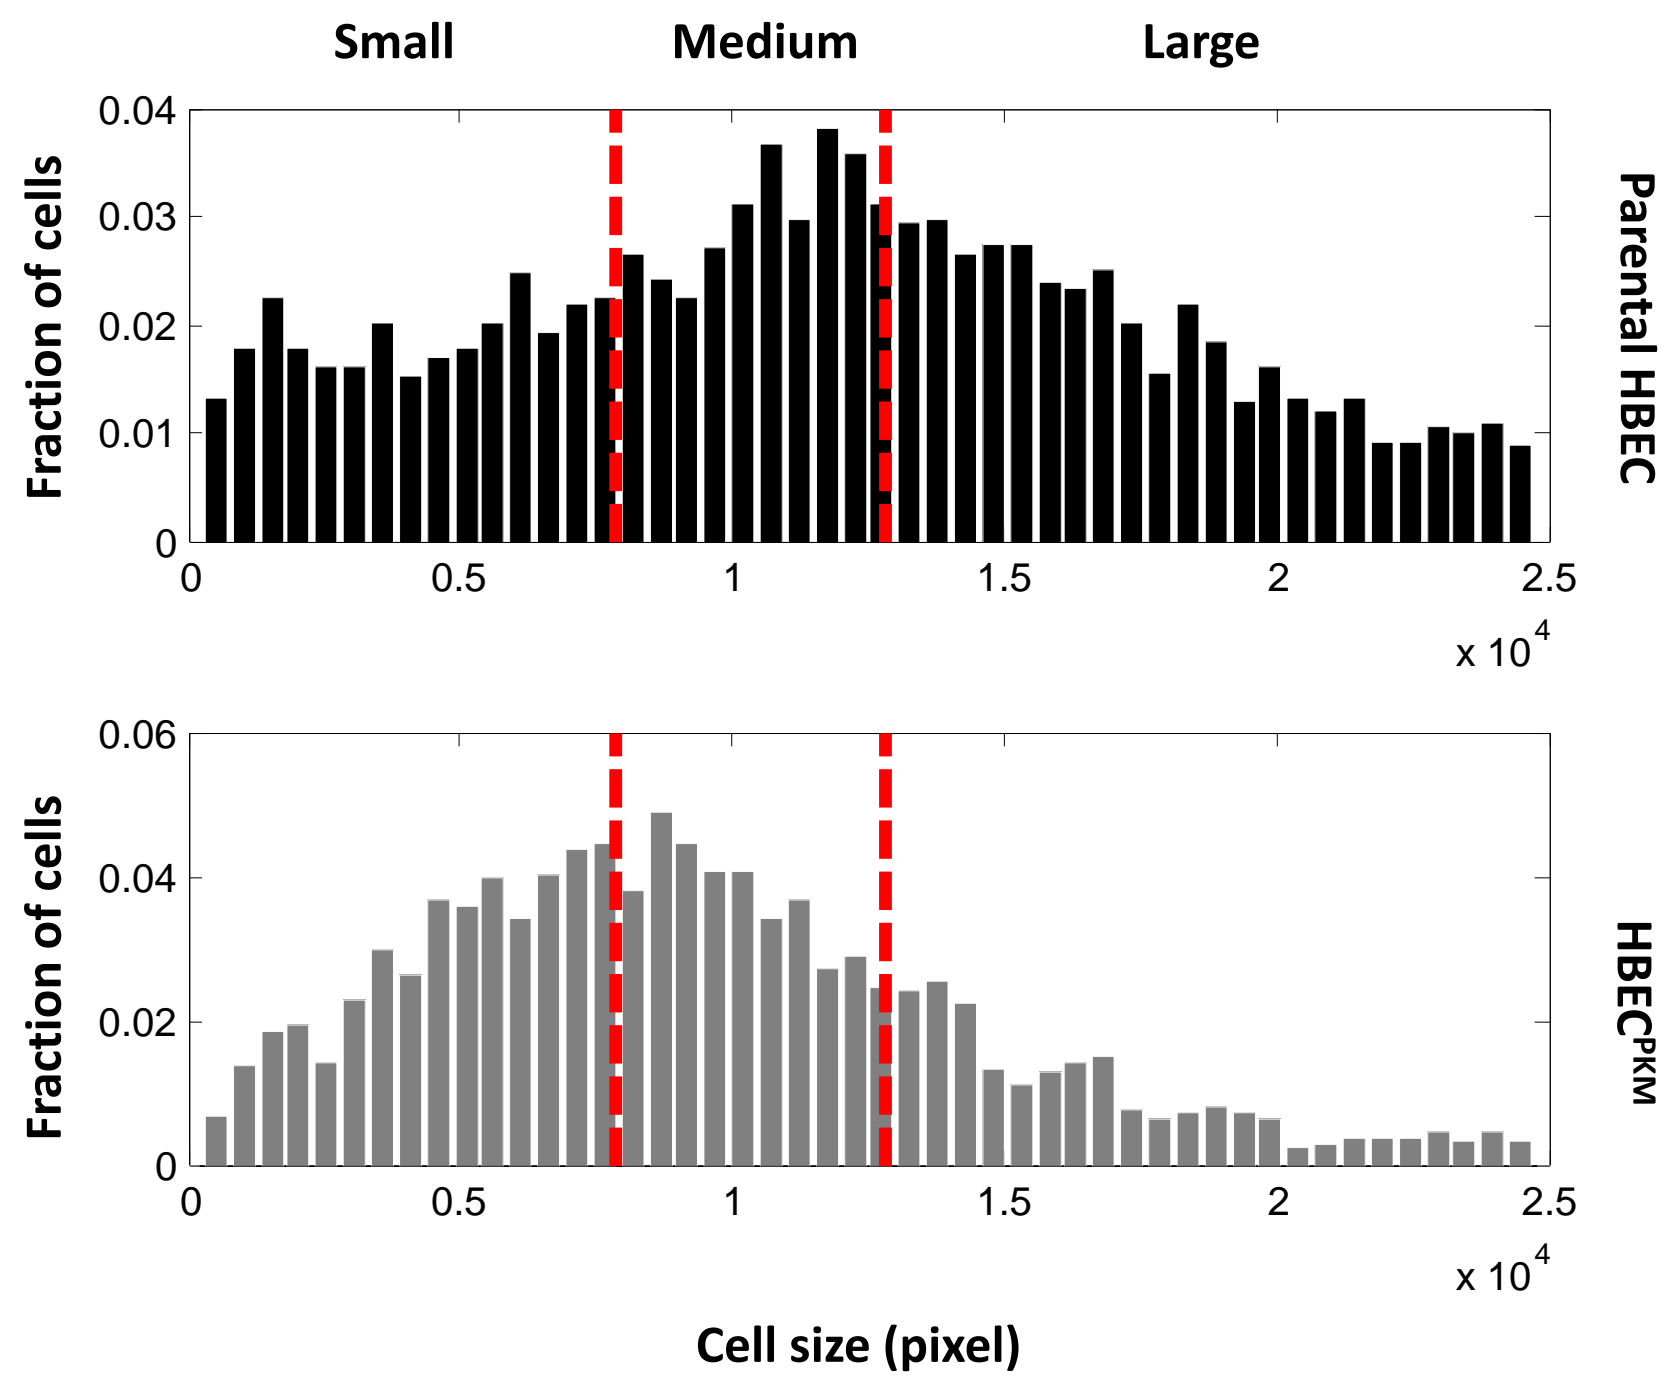

**B**

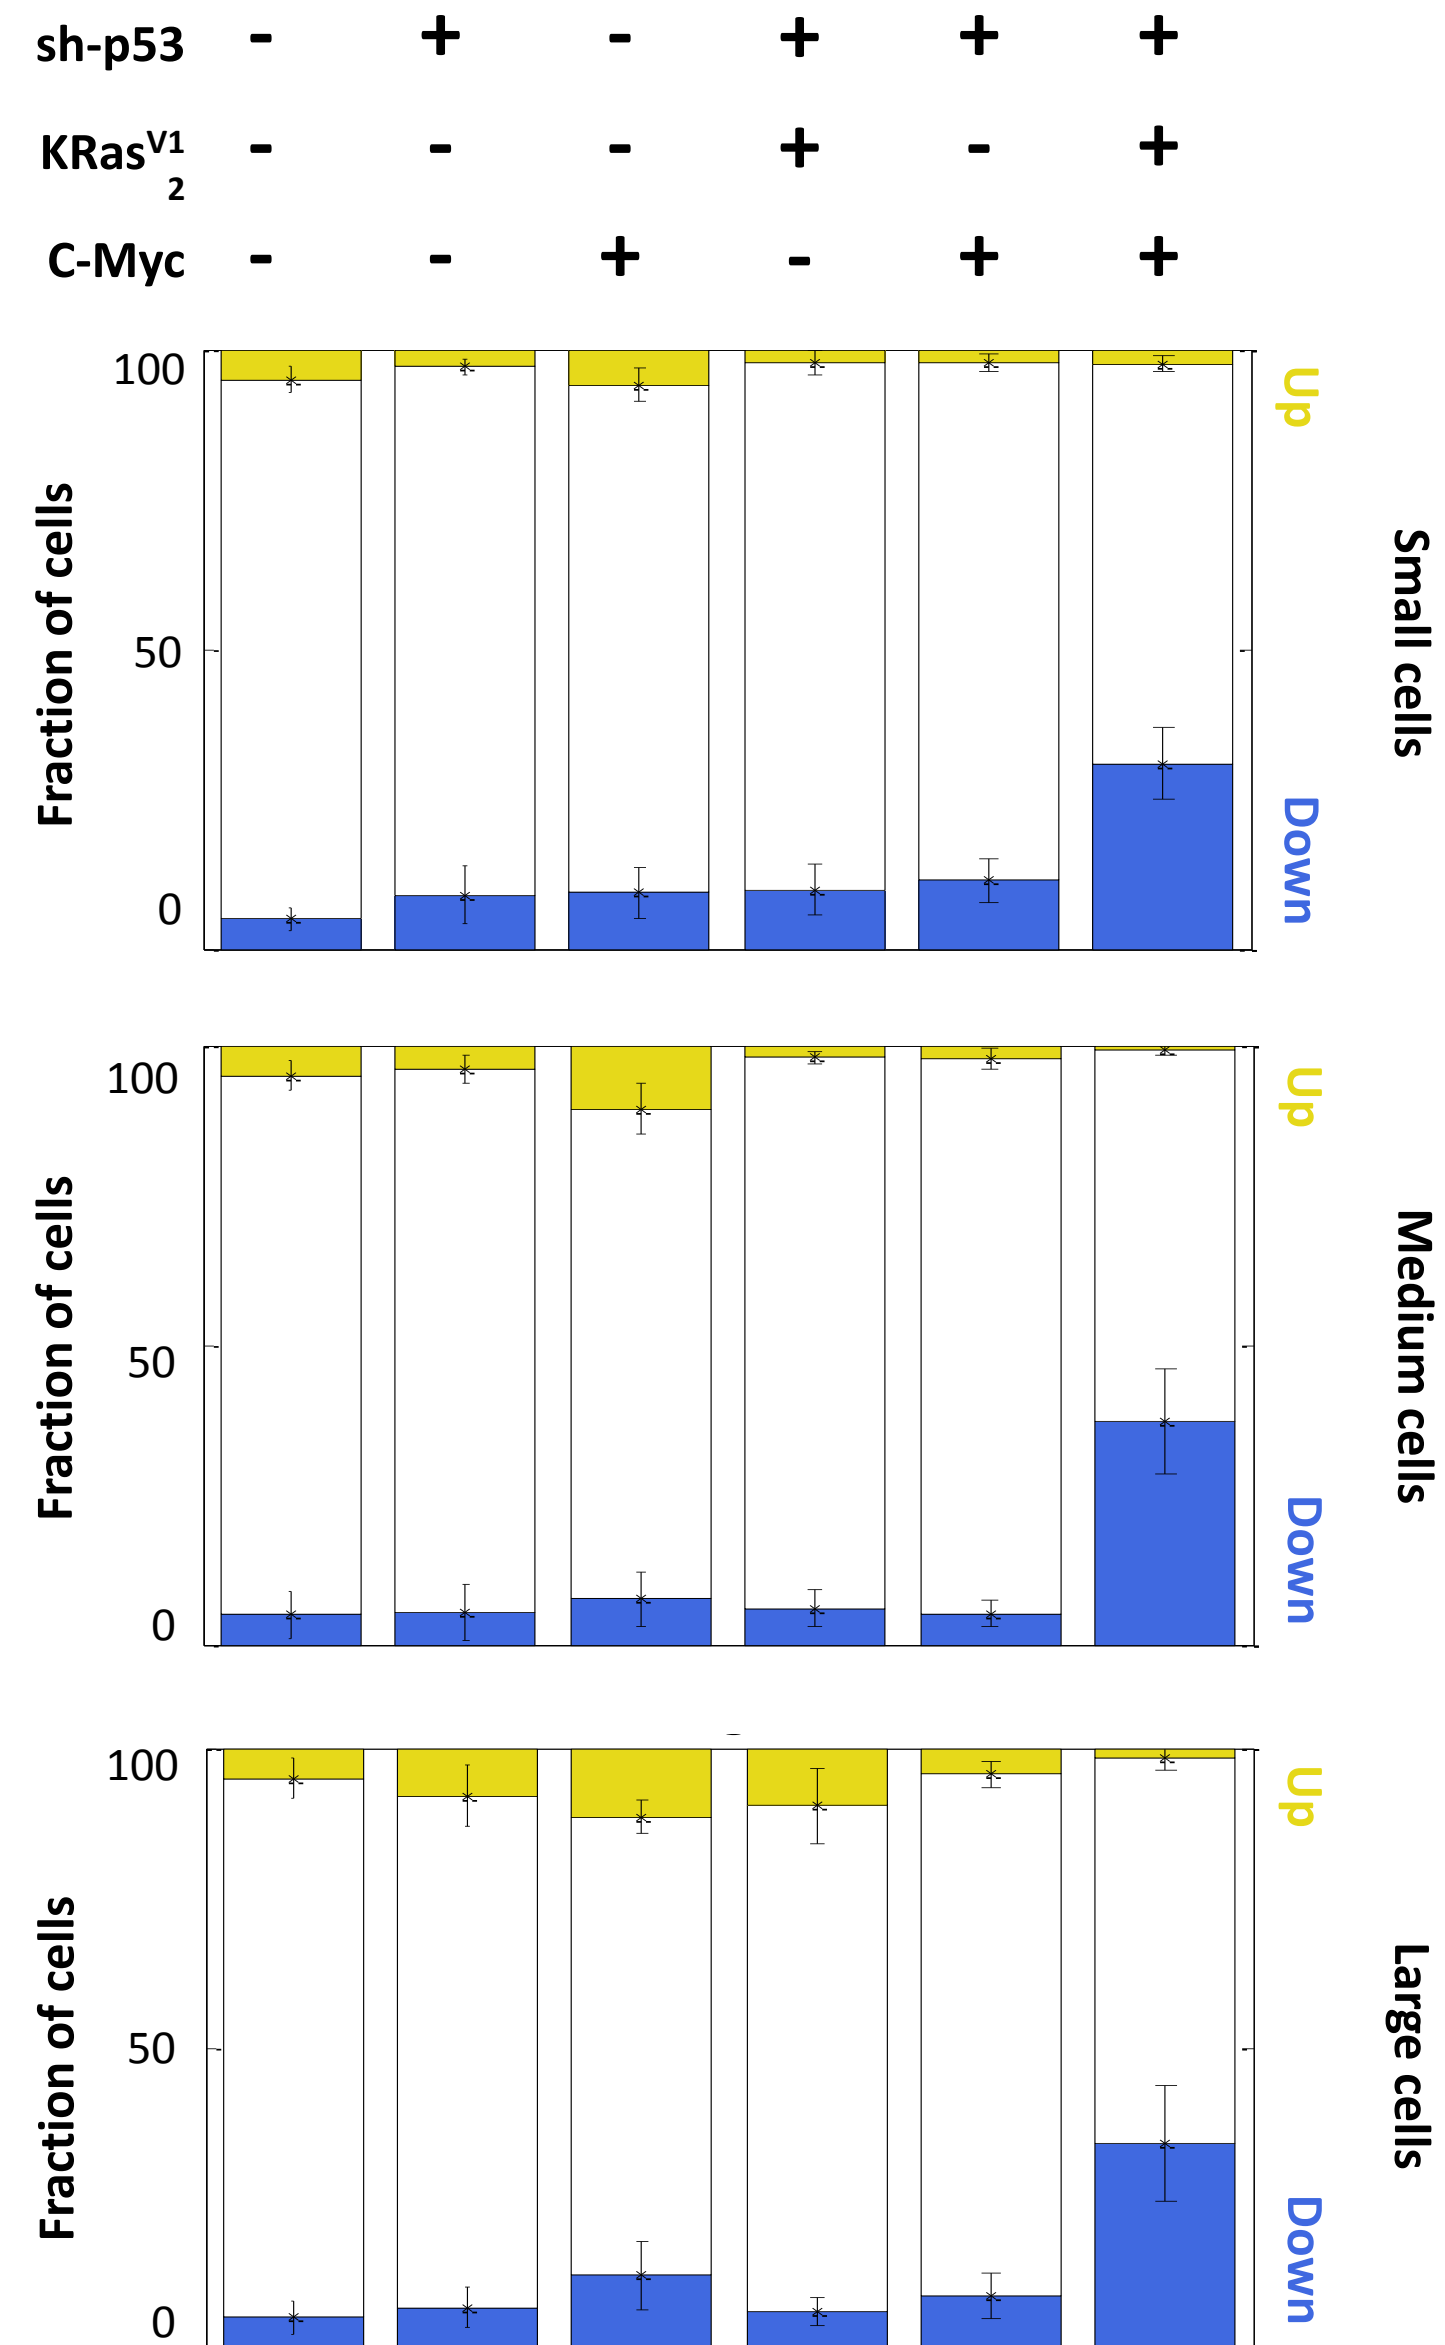



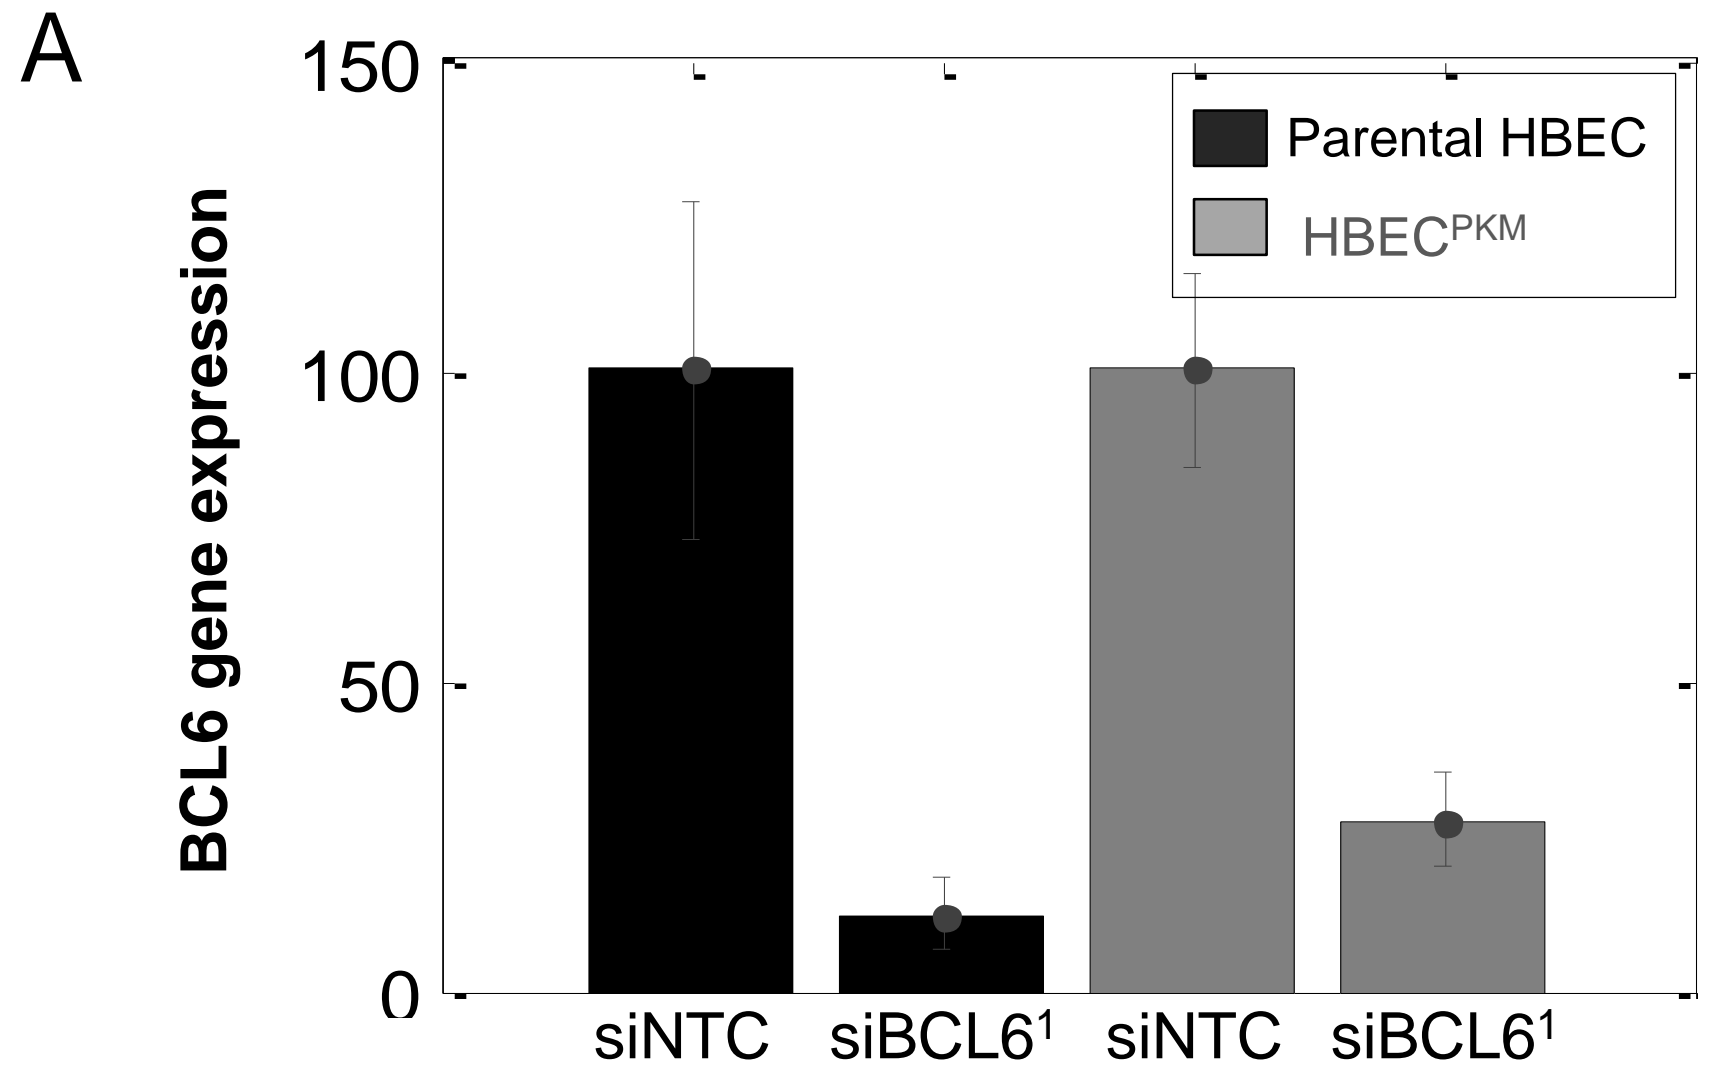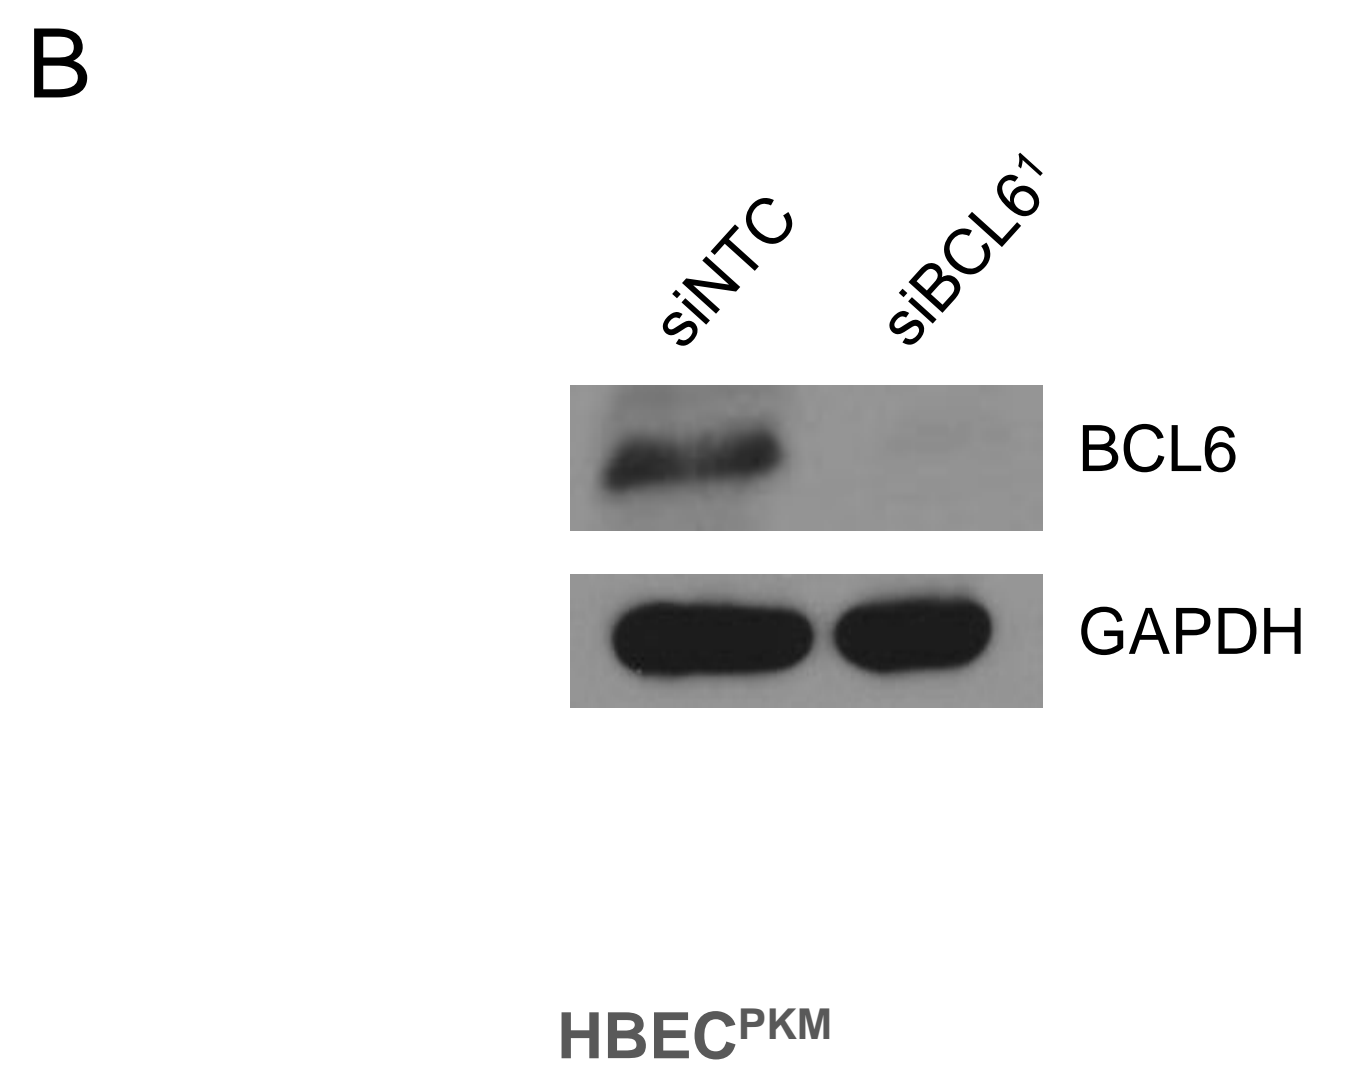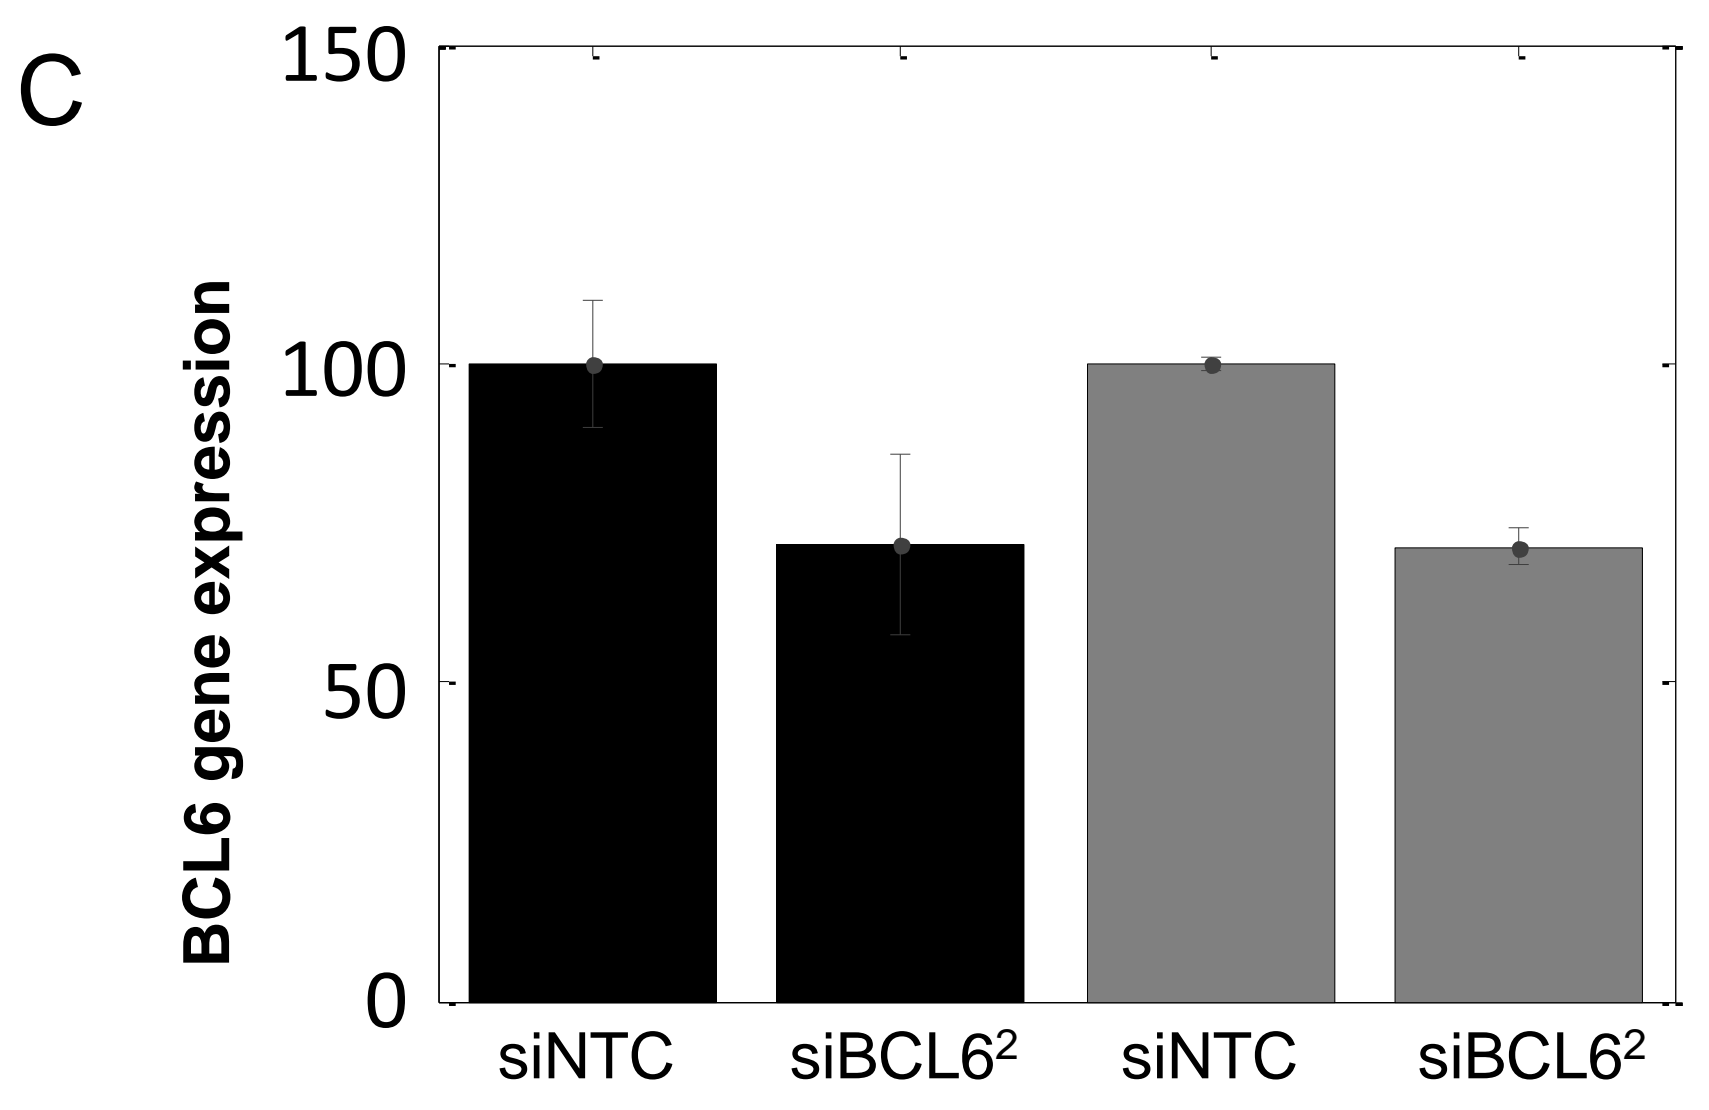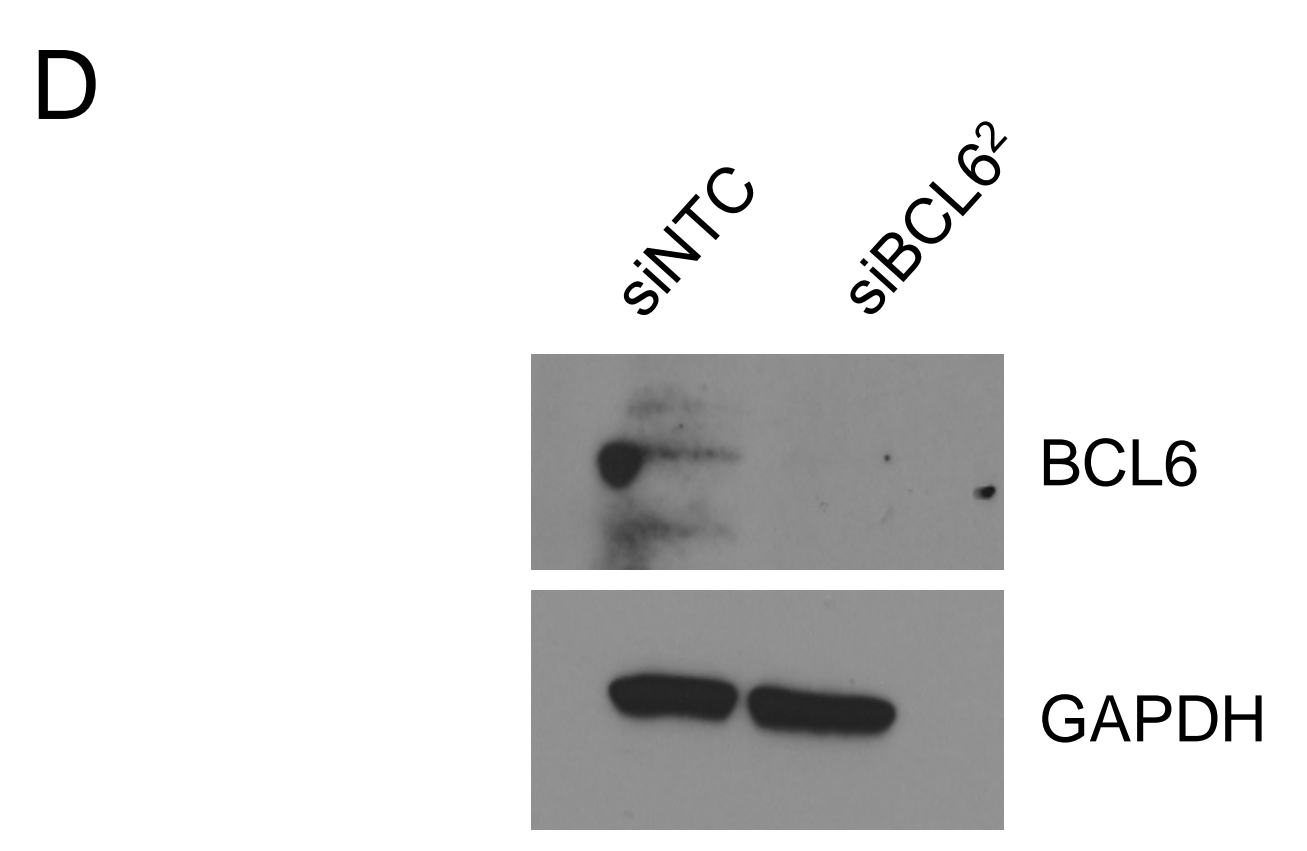

Supplementary Table 1: signaling readouts of interest for immunofluorescence assay

| <b>Antibody</b>                   | <b>Vendor</b>  | <b>Catalog #</b> | <b>Lot #</b> | <b>Dilution</b> |
|-----------------------------------|----------------|------------------|--------------|-----------------|
| <b><math>\beta</math>-catenin</b> | Cell Signaling | 4627S            | 5            | 1:300           |
| <b>p-Stat3</b>                    | BD             | 612543           | 28597        | 1:400           |
| <b>Smad2/3</b>                    | Cell Signaling | 8685S            | 1            | 1:800           |
| <b>P65</b>                        | Cell Signaling | 4764S            | 3            | 1:400           |
| <b>Foxo1</b>                      | Cell Signaling | 2880B            | 5            | 1:300           |
| <b>p-Erk1/2</b>                   | Cell Signaling | 9101S            | 27           | 1:200           |
| <b>p-Smad2/3</b>                  | Cell Signaling | 8828S            | 4            | 1:400           |
| <b>Stat3</b>                      | Cell Signaling | 9132S            | 9            | 1:400           |

Supplementary Table 2: Primary antibodies for immunoblot

| <b>Antibody</b> | <b>Vendor</b>  | <b>Catalog #</b> | <b>Lot #</b> | <b>Dilution</b> |
|-----------------|----------------|------------------|--------------|-----------------|
| <b>p-Stat3</b>  | BD             | 612543           | 28597        | 1:1000          |
| <b>p-Smad3</b>  | Cell Signaling | 9520S            | 4            | 1:1000          |
| <b>Stat3</b>    | Cell Signaling | 9132S            | 9            | 1:1000          |
| <b>GAPDH</b>    | GeneTex        | GTX627408        | --           | 1:2000          |

Supplementary Table 3: Treatment schedule for H1993 cell line derived subcutaneous xenografts

|        | Day 14   | Day 15   | Day 16   | Day 17   | Day 18                | Day 19   | Day 20   |
|--------|----------|----------|----------|----------|-----------------------|----------|----------|
| BBI608 | 20 mg/kg | -        | -        | 20 mg/kg | Mice started          | -        | -        |
| FX1    | -        | 25 mg/kg | 25 mg/kg | -        | losing fur.<br>Gave a | 25 mg/kg | 25 mg/kg |
| Combo  | 20 mg/kg | 25 mg/kg | 25 mg/kg | 20 mg/kg | break to<br>recover.  | 25 mg/kg | 25 mg/kg |

  

|        | Day 21   | Day 22                                    | Day 23             | Day 24             | Day 25                | Day 26   | Day 27   |
|--------|----------|-------------------------------------------|--------------------|--------------------|-----------------------|----------|----------|
| BBI608 | 20 mg/kg | Mice in                                   | -                  | -                  | -                     | -        | -        |
| FX1    | -        | combo<br>group lost<br>10% body<br>weight | Did not<br>recover | Did not<br>recover | Majority<br>recovered | 25 mg/kg | 25 mg/kg |
| Combo  | 20 mg/kg | -                                         | -                  | -                  | -                     | 25 mg/kg | 25 mg/kg |

  

|        | Day 28   | Day 29                                            | Day 30 | Day 31 | Day 32 | Day 33   | Day 34   |
|--------|----------|---------------------------------------------------|--------|--------|--------|----------|----------|
| BBI608 | 20 mg/kg | -                                                 | -      | -      | -      | -        | -        |
| FX1    | -        | Followed the same drug holiday from the last week |        |        |        | 25 mg/kg | 25 mg/kg |
| Combo  | 20 mg/kg | -                                                 | -      | -      | -      | 25 mg/kg | 25 mg/kg |

  

|        | Day 33   | Day 34                                            | Day 35 | Day 36 | Day 37 | Day 38                    | Day 39 |
|--------|----------|---------------------------------------------------|--------|--------|--------|---------------------------|--------|
| BBI608 | 20 mg/kg | -                                                 | -      | -      | -      | Mice were<br>sacrificed,  |        |
| FX1    | -        | Followed the same drug holiday from the last week |        |        |        | tumors<br>were<br>weighed |        |
| Combo  | 20 mg/kg | -                                                 | -      | -      | -      | and<br>measured           |        |

Note: The dose of BBI608 (STAT3 inhibitor) and FX1 (BCL6 inhibitor) are shown in purple and red respectively.
